1

2

3

# CRCM5484: A BET- BDII Selective Compound

4

## With Differential Anti-Leukemic Drug Modulation

5

6 *Kendall Carrasco<sup>1</sup>; Camille Montersino<sup>1,2</sup>; Carine Derviaux<sup>1,2</sup>; Magali Saez-Ayala<sup>1</sup>; Laurent Hoffer<sup>1</sup>; Audrey*

7

*Restouin<sup>1,2</sup>; Rémy Castellano<sup>1,2</sup>; Justine Casassa<sup>1</sup>; Philippe Roche<sup>1</sup>; Eddy Pasquier<sup>1</sup>; Sébastien Combes<sup>1</sup>;*

8

*Xavier Morelli<sup>1,2\*</sup>; Yves Collette<sup>1,2\*</sup> & Stéphane Betzi<sup>1\*</sup>*

9

<sup>1</sup>CNRS, INSERM, Aix-Marseille Univ, Institut Paoli-Calmettes, CRCM, 13009 Marseille, France

10

<sup>2</sup>Institut Paoli-Calmettes, plateforms HiTS & TrGET, 13009 Marseille, France

11

- 1 KEYWORDS:
- 2 Bromodomain, protein-protein interaction, hit-to-lead, optimization, focused library, diversity-oriented
- 3 library, drug discovery, BDII selective inhibitor, modulation, potentiation, bone-marrow-derived stromal
- 4 cell conditioned medium.
- 5

1 ABSTRACT

2 Differentially screening the Fr-PPIChem chemical library on the BET BRD4-BDII versus -BDI  
3 bromodomains led to the discovery of a BDII selective tetrahydropyridothienopyrimidinone (THPTP)-  
4 based compound. Structure-activity relationship (SAR) and hit-to-lead approaches allowed us to develop  
5 CRCM5484, a potent inhibitor of BET proteins with a preferential and 475-fold selectivity for the second  
6 bromodomain of the BRD3 protein (BRD3-BDII) over its first bromodomain (BRD3-BDI). Its very low  
7 activity was demonstrated in various cell-based assays, corresponding with recent data describing other  
8 selective BDII compounds. However, screening on a drug sensitivity and resistance-profiling platform  
9 revealed its ability to modulate the anti-leukemic activity in combination with various FDA-approved  
10 and/or in-development drugs in a cell- and context-dependent differential manner. Altogether, the  
11 results confirm the originality of the THPTP molecular mode of action in the BD cavity and its potential  
12 as starting scaffold for the development of potent and selective bromodomain inhibitors.

13

## 1 INTRODUCTION

2 The bromodomain and extra-terminal (BET) family is composed of four epigenetic reader proteins,  
3 ubiquitous BRD4, BRD3 and BRD2 and testis-restricted BRDT. Each protein of this family includes a  
4 tandem small protein domain called bromodomain (BD) labeled BDI and BDII, both localized at the N-  
5 terminus of the proteins, and this domain can recognize and bind acetylated lysine on the histone tails.  
6 When BDs are bound to chromatin, they recruit transcription factors and play a role in gene  
7 transcription<sup>1</sup>. Pan-BET inhibitors are small compounds that can bind the eight BET BDs with similar  
8 potencies. This class of BD inhibitors has already been extensively studied for their therapeutic potential  
9 in both inflammation<sup>2-8</sup> and oncology applications<sup>9-14</sup>. Among these well-studied compounds are  
10 JQ1<sup>10,15</sup>, OTX-015<sup>16</sup> and I-BET-151<sup>17</sup>. Some of these molecules are currently being evaluated in clinical  
11 trials with oncology indications, confirming the interest for this protein family as therapeutic targets<sup>18-20</sup>.  
12 Nevertheless, toxicities and resistance phenomena have also been reported<sup>19,21-23</sup>. One of the main  
13 strategies to understand and overcome these issues has been to elucidate the functional contribution of  
14 the individual BDI and BDII domains in the BET family with the purpose of improving the adverse event  
15 profile observed in clinical trials.

16 Despite a high homology across the BDs in the BET family, several selective inhibitors of the BDI or  
17 BDII BET domains have recently emerged in the literature<sup>24-27</sup>, but few are currently engaged in clinical  
18 trials. The first developed selective compounds were BDI selective, the most extensively studied are  
19 olinone<sup>28</sup>, MS402<sup>29</sup>, and GSK778<sup>30</sup>. Developing BDII selective compounds was far more challenging, and  
20 only a handful of BDII selective inhibitors have been developed to date (Figure 1). The oldest compound,  
21 RVX-208 based on a quinazolinone chemical core, exhibited a selectivity of 20-fold with  $K_D$  values of  
22 4100 nM and 200 nM (as measured by microcalorimetry (ITC)) against BRD4-BDI and BRD4-BDII,  
23 respectively<sup>14,31</sup>. GSK340 with a tetrahydroquinoxaline core is another BDII selective compound that  
24 exhibited  $K_D$  values of 3000 nM and 63 nM against BRD4-BDI and BRD4-BDII, respectively<sup>32</sup> (as  
25 determined by BROMOScan). Very recently, ABBV-744 (tetrahydropyrrolopyridinone) was reported as a

1 nanomolar BDII selective inhibitor and clinical candidate with a  $K_D$  measured by TR-FRET at 520 nM and  
2 1.6 nM against BRD4-BDI and BRD4-BDII, respectively<sup>33,34</sup>. Finally, GSK046 (fluorobenzamide) and  
3 GSK620 (pyridinone), the latest additions to this list of BDII selective compounds, displayed  $IC_{50}$  values  
4 against the BDs of BRD3 that were 3600 nM and 98 nM for GSK046, and 2500 nM and 72 nM for  
5 GSK620, as determined by TR-FRET<sup>30,35</sup>. These compounds were evaluated for application in  
6 inflammatory disease, and the authors concluded that inhibition of the BET BDII domain may be a useful  
7 therapeutic strategy to counter inflammatory damage<sup>30</sup>.

8 In order to seek for new potential cores selective of either BDI or BDII domains, we miniaturized and  
9 robotized a 1536 BD inhibitors assay and initiated a differential (BDI vs BDII) high-throughput screen  
10 (HTS) of the Fr-PPICChem library. Fr-PPICChem is a unique chemical library composed of 10314 diverse  
11 small molecules dedicated to protein-protein interaction (PPI) inhibition that displays considerably  
12 higher hit rates against PPIs than that of classical libraries<sup>36</sup>. Another fundamental advantage of this  
13 library is that its compounds as well as a series of structural analogs are commercially available.  
14 Moreover, medicinal chemistry filters were applied to remove undesirable structures (such as Pan-Assay  
15 Interference Compounds [PAINS], frequent hitters and toxic compounds) and to improve drug-likeness  
16 properties. From the Fr-PPICChem screen, an original tetrahydropyridothienopyrimidinone (THPTP)-based  
17 compound was identified as a bromodomain binder with a BDII selective profile that was further  
18 optimized through a structure activity relationship (SAR) campaign assisted by X-ray structural data. Our  
19 optimized hit - CRCM5484 - exhibits similar *in vitro* and in cellular activity to the most selective  
20 compounds described in the literature. Finally, a drug sensitivity response profile (DSRP) in a  
21 combination screen of CRCM5484 with 78 pharmacological agents pinpointed that CRCM5484 could  
22 potentiate the antiproliferative activity of certain drugs in patient-derived leukemia cells, which could be  
23 exploited for future developments. This potentiating effect is dependent upon the cellular context, and  
24 the drug response could be further potentiated with the addition of culture medium conditioned by

- 1 human bone marrow stromal cells to mime the microenvironment of tumor cells; this highlights the
- 2 importance of considering the impact of the tumor microenvironment when evaluating drug sensitivity
- 3 in oncology.

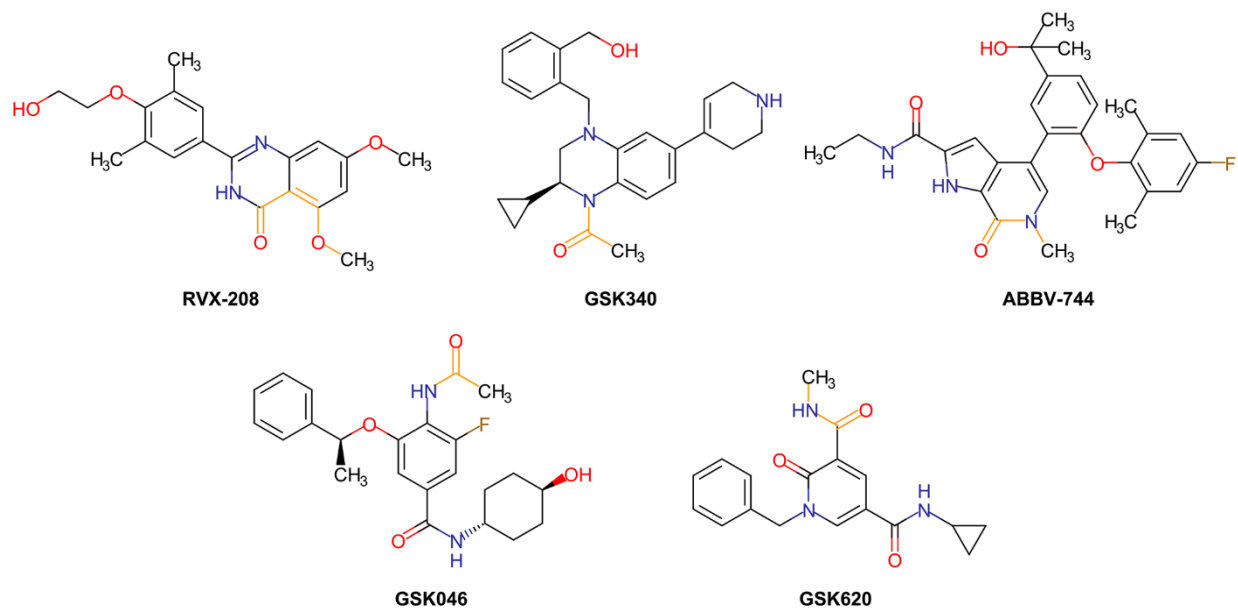

- 4
- 5 **Figure 1. Chemical structures of the literature BDII selective inhibitors RVX-208, GSK340, ABBV-744, GSK046 and GSK620.**
- 6 Chemical moieties mimicking the histone acetylated lysine interaction with the key asparagine amino acid of the BDs are
- 7 highlighted in orange.

8

1 RESULTS

2 **THPTP core was identified by a “Fr-PPIChem” screening as a candidate for selective BDII BET**  
3 **inhibition**

4 To develop our BDII selective BET inhibitor, we performed a differential screening on the “Fr-  
5 PPIChem” chemical library<sup>36</sup>. We used homogeneous time-resolved fluorescence (HTRF)<sup>37</sup> to screen the  
6 10314 compound library against both BDs of BRD4 (BRD4-BDI and BRD4-BDII). The scatter plot in Figure  
7 2A confirms that the hits in the eight 1536-well screening plates were randomly distributed, thus  
8 experimental bias could be excluded. In addition, we measured several statistical data quality features  
9 for the screening. All these indicators were in agreement with industry standards, including Z' factors of  
10 0.83 and 0.87 and signal-to-noise ratios of 12.5 and 7.8 for BRD4-BDI and BRD4-BDII, respectively. The  
11 variability coefficient was also found to be below 5% for the whole screening. The screen designed to  
12 highlight BDII selective compounds identified 17 molecules with >30% BRD4-BDII inhibition and <30%  
13 BRD4-BDI screening at a final concentration of 1.25  $\mu$ M. Among the molecules that met these criteria, 7  
14 were selected for further evaluation (Table 1 and Figure S1 and S2A). The same selection threshold used  
15 to select BDI selective compounds would have led to 132 molecules, highlighting the challenge of  
16 developing BDII over BDI selective inhibitors.

17 We focused on compound **1** (Figure 2B) because it had a high affinity for BRD4-BDII (~900 nM) and  
18 because of its original THPTP chemical scaffold in the BET inhibitor chemical landscape. Indeed, only one  
19 related compound could be identified for this chemical scaffold in the literature as a BD binder in one  
20 crystal structure deposited in the PDB in 2016 (PDB ID: 4ZW1), but there was no follow-up study or  
21 publication exploiting these data (Figure S3A). The other identified compounds, a dimethyl isoxazole  
22 core of **2**, **3** and **4**, has already been described in the BD inhibitor I-BET-151<sup>25</sup> or GSK778<sup>30</sup>, and the  
23 trimethoxyphenyl core of **5** is found in DC-BD-03<sup>38</sup> (Figure S2B). These results demonstrate the potential  
24 of the Fr-PPIChem chemical library to identify a new chemical core during a screening campaign.

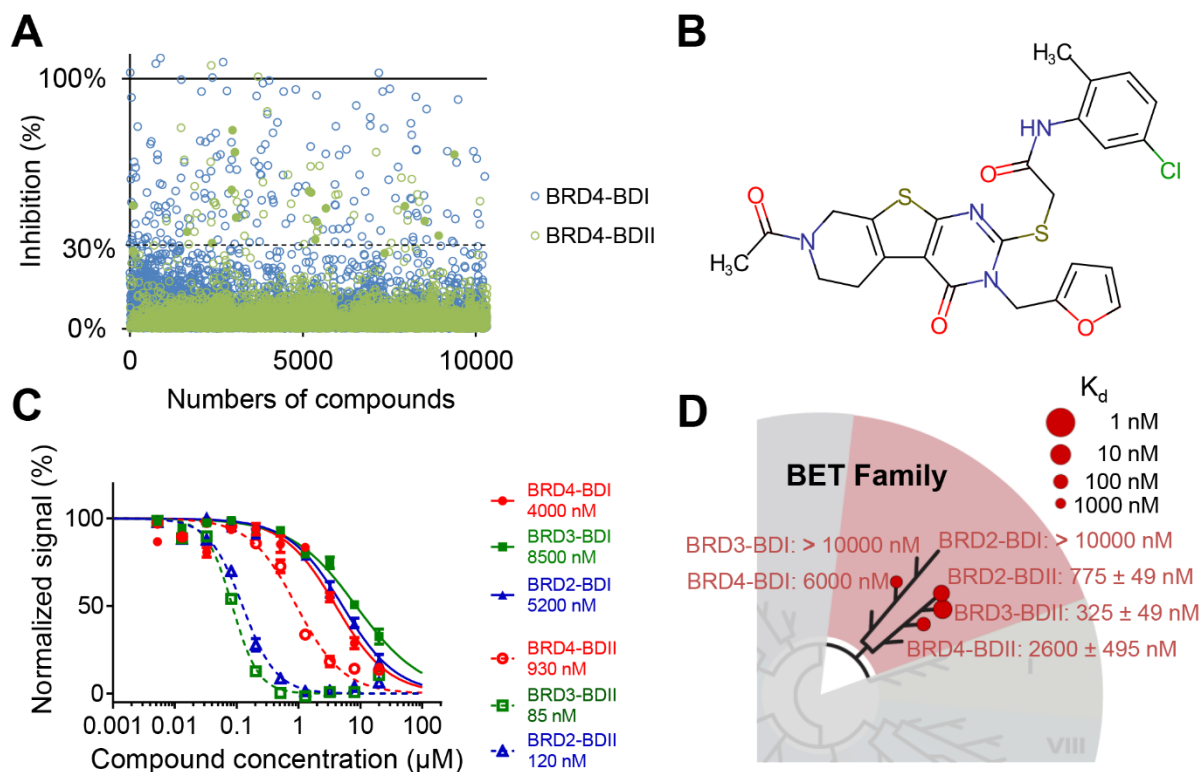

1  
2 **Figure 2. Fr-PPICChem screening and compound 1 characterization.** (A) Scatter plot of Fr-PPICChem screening results against  
3 BRD4-BDI (empty blue circles) and BRD4-BDII (empty green circles). BDII selective compounds identified above the 30%  
4 threshold are shown as solid green circles. (B) Compound 1 chemical structure. (C) HTRF selectivity assay on the BDI (solid lines)  
5 and BDII (dashed lines) of BRD2 (blue), BRD3 (green) and BRD4 (red). (D) BROMOscan data on the BET bromodomain family for  
6 both BDs of BRD2, BRD3 and BRD4.

7 **Table 1. Screening results of seven BDII selective hits identified.** The  $IC_{50}$   
8 were obtained by HTRF assay on BRD4-BDI and BRD4-BDII.

| Compound | $IC_{50}$ ( $\mu\text{M}$ ) |               | BDII selectivity (fold) |
|----------|-----------------------------|---------------|-------------------------|
|          | BRD4-BDI                    | BRD4-BDII     |                         |
| 1        | 4.0 $\pm$ 0.5               | 0.9 $\pm$ 0.1 | 4.4                     |
| 2        | 11.0 $\pm$ 0.9              | 0.9 $\pm$ 0.1 | 12.0                    |
| 3        | 9.3 $\pm$ 0.8               | 1.1 $\pm$ 0.1 | 7.8                     |
| 4        | 7.4 $\pm$ 0.5               | 1.5 $\pm$ 0.1 | 4.9                     |
| 5        | 4.3 $\pm$ 0.2               | 0.8 $\pm$ 0.1 | 5.4                     |
| 6        | 8.2 $\pm$ 0.8               | 0.9 $\pm$ 0.1 | 9.0                     |
| 7        | 1.1 $\pm$ 0.1               | 3.2 $\pm$ 0.5 | 0.4                     |

9  
10 The affinity and the selectivity of **1** were confirmed by two experiments: an HTRF selectivity assay on  
11 the six BDs of the BET family and a BROMOscan assay on the whole BD family tree (DiscoverX - Eurofins)  
12 (Figure 2C and D). These results confirm that **1** preferentially binds the BDII domains of BRD3 and BRD2,



1 as confirmed by the IC<sub>50</sub> values of 43 nM and 120 nM, respectively, which were measured by HTRF. The  
2 affinity for BRD4-BDII is significantly lower, with an IC<sub>50</sub> of 930 nM. This was further supported by the  
3 BROMOscan results, in which the dissociation constants for the BDIIs of BRD4, BRD3 and BRD2 were  
4 measured at 2600 nM, 325 nM and 775 nM, respectively. This characteristic is common to other  
5 already-published BDII selective compounds, such as GSK046 and GSK620 that also bind preferentially  
6 the BDII sub-domains of BRD2 and BRD3 over BRD4-BDII<sup>30</sup>.

### 7 **THPTP optimization by SAR**

8 To investigate the molecular mode of action of **1** and how its different chemical functions affect the  
9 affinity and selectivity toward BET BDs, we initiated an SAR campaign by ordering similar compounds  
10 from commercial libraries (SAR by catalog). The first five compounds purchased were selected because  
11 of the common 7-alcanoyl-5,6,7,8-tetrahydropyrido[4',3':4,5]thieno[2,3-d]pyrimidin-4(1H)-one core, as  
12 shown in Table 2. After measuring their affinities for both BDs of BRD3 by HTRF, we concluded that the  
13 *N*-acetylated pyrido moiety is a key binding component. This observation suggests there is a different  
14 binding mode than that of the 4ZW1 PDB compound in which the interaction is driven by the xlenol  
15 core (Figure S3).

16 The presence of a furfuryl group as an R substituent also appears to be important for the selectivity  
17 profile. This substitution is indeed the only difference from **1**, and the affinity for BRD3-BDII is degraded  
18 with IC<sub>50</sub> values of 85 nM, 410 nM and 6300 nM for **1**, **8** and **9**, respectively. Compound **12** is the best  
19 compound in this series, exhibiting an IC<sub>50</sub> of 140 nM on BRD3-BDII and a selectivity of 100-fold. We  
20 hypothesized that the furan moiety adopts a position in close proximity to histidine H433 of BRD2-BDII,  
21 one of the main hot-spot amino acids that is targeted when developing BDII selective drugs. H433 is  
22 indeed one of the few residues discriminating BDII from BDI in an otherwise identical cavity. The only  
23 difference with **1** is the unsubstituted phenyl ring (Table 2). This observation suggests that aryl is

1 important for binding to BD. The HTRF assay on BRD4, BRD3 and BRD2 for both BDs shows that **12**  
 2 maintains the BDII selective profile (Figure S4A).

3 **Table 2. Structure Activity Relationship (SAR) by catalog.** The IC<sub>50</sub> were obtained by HTRF assay on BRD3-BDI and BRD3-BDII.

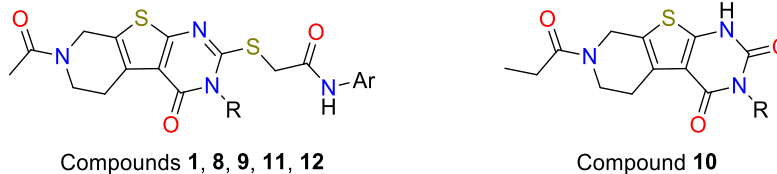

| Compound  | R                          | Ar                      | IC <sub>50</sub> (nM) |             | BDII selectivity (fold) |
|-----------|----------------------------|-------------------------|-----------------------|-------------|-------------------------|
|           |                            |                         | BRD3-BDI              | BRD3-BDII   |                         |
| <b>1</b>  | 2-furfuryl                 | 5-chloro-2-methylphenyl | 8500 ± 130            | 85 ± 3      | 100                     |
| <b>8</b>  | phenyl                     | 5-chloro-2-methylphenyl | > 25000 ± 1487        | 6300 ± 220  | > 4                     |
| <b>9</b>  | tetrahydrofuran-2-ylmethyl | 5-chloro-2-methylphenyl | 7800 ± 400            | 410 ± 10    | 19                      |
| <b>10</b> | cyclohexyl                 | -                       | > 25000 ± 2435        | NA          | NA                      |
| <b>11</b> | phenyl                     | phenyl                  | > 25000 ± 1726        | 5500 ± 3638 | > 5                     |
| <b>12</b> | 2-furfuryl                 | phenyl                  | 14000 ± 510           | 140 ± 10    | 100                     |

5 The importance of aryl prompted us to further investigate with another round of SAR by catalog,  
 6 focusing on various phenyl substitutions. As the HTRF evaluation of the previous series identified  
 7 solubility issues, we also included the predicted compound log P as an additional selection metric. We  
 8 chose compounds with a log P below 4 because the predicted log P of **1** is 4.2 (Table3). The affinity and  
 9 selectivity evaluation of this series by HTRF provided valuable SAR information. First, methyl, ethoxy or  
 10 methoxy substituents in the *-Para* position degraded the affinity for BRD3-BDII, with IC<sub>50</sub> values ranging  
 11 from 570 to 880 nM against the 190 nM measured for **12**. This suggests the ring has a close proximity to  
 12 the protein surface, causing steric hindrance when substituents are included. Substitution with a  
 13 methoxy or ethoxy groups in the *-Ortho* position could increase the compound affinity because of  
 14 additional hydrogen bonds. Compound **16**, with anisole, is the most interesting compound of this set,  
 15 with affinities of 2 200 nM and 72 nM for BRD3-BDI and BRD3-BDII, respectively. The HTRF assay on both  
 16 BDs of the BET family validated the BDII selective profile of **16** (Figure S4B).

1 **Table 3. Structure Activity Relationship (SAR) of compound 12 benzyl ring.** IC<sub>50</sub> values were obtained by HTRF on BRD3-BDI  
 2 and BRD3-BDII. Log P values were generated with Marvin Sketch. Compounds are sorted according to their affinity for BRD3-  
 3 BDII.

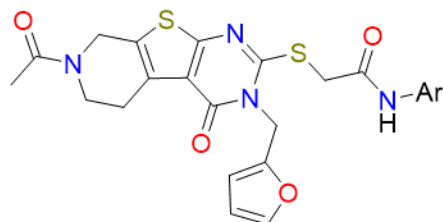

| Compound | Ar                      | Log P | IC <sub>50</sub> (nM) |           | BDII selectivity (fold) |
|----------|-------------------------|-------|-----------------------|-----------|-------------------------|
|          |                         |       | BRD3-BDI              | BRD3-BDII |                         |
| 1        | 5-Chloro-2-methylphenyl | 4.2   | 8500 ± 130            | 85 ± 3    | 100                     |
| 12       | phenyl                  | 3.0   | 2100 ± 230            | 190 ± 12  | 11                      |
| 13       | 3-Methoxyphenyl         | 2.9   | 2800 ± 330            | 300 ± 12  | 9                       |
| 14       | 2-Chlorophenyl          | 3.7   | 2300 ± 180            | 100 ± 5   | 23                      |
| 15       | 3-Methylphenyl          | 3.6   | 5200 ± 2100           | 440 ± 34  | 12                      |
| 16       | 2-Methoxyphenyl         | 2.9   | 2200 ± 150            | 72 ± 3    | 31                      |
| 17       | 4-Methoxyphenyl         | 2.9   | 3600 ± 910            | 570 ± 22  | 6                       |
| 18       | 4-Fluorophenyl          | 3.2   | 3000 ± 2300           | 420 ± 18  | 7                       |
| 19       | 2-Methylphenyl          | 3.6   | 3200 ± 750            | 220 ± 7   | 15                      |
| 20       | 3-Methylphenyl          | 3.6   | 3100 ± 970            | 630 ± 23  | 5                       |
| 21       | 3-Chlorophenyl          | 3.7   | 4400 ± 1700           | 490 ± 15  | 9                       |
| 22       | 2-Ethoxyphenyl          | 3.2   | 3500 ± 730            | 150 ± 9   | 23                      |
| 23       | 2-4-Difluorophenyl      | 3.3   | 7500 ± 3300           | 380 ± 13  | 13                      |
| 24       | 2-Fluorophenyl          | 3.2   | 4200 ± 320            | 210 ± 6   | 20                      |
| 25       | 3-Fluoro-4-methylphenyl | 3.7   | 6500 ± 5200           | 210 ± 6   | 31                      |
| 26       | 3-Methylthiophenyl      | 3.7   | 4500 ± 1900           | 410 ± 12  | 11                      |
| 27       | 4-Chlorophenyl          | 3.7   | 4500 ± 2000           | 530 ± 18  | 8                       |
| 28       | 2-5-Difluorophenyl      | 3.3   | 4100 ± 1600           | 170 ± 4   | 24                      |
| 29       | 3-Acetylphenyl          | 2.6   | 1500 ± 64             | 170 ± 6   | 9                       |
| 30       | 4-Acetylphenyl          | 2.6   | 1300 ± 45             | 320 ± 12  | 4                       |
| 31       | 4-Ethoxyphenyl          | 3.2   | 3800 ± 2500           | 880 ± 22  | 4                       |
| 32       | 3-Chloro-4-fluorophenyl | 3.8   | 4900 ± 2700           | 740 ± 28  | 7                       |
| 33       | 3,4-Difluorophenyl      | 3.3   | 3800 ± 1500           | 470 ± 11  | 8                       |

7  
8 At this point, all purchasable analogs were evaluated, and we expanded the SAR study with in-house  
 9 chemical synthesis. We pursued the optimization strategy by exploring additional modifications of the  
 10 aromatic ring to increase the activity and solubility. With the addition of the piperidine group, the  
 11 predicted Log P decreased from 2.9 for compound 16 to 2.4 for compound 34 (CRCM5484). The 2-((7-

1 acetyl-3-(furan-2-ylmethyl)-4-oxo-3,4,5,6,7,8-hexahydropyrido[4',3':4,5]thieno[2,3-d]pyrimidin-2-  
2 yl)thio)-*N*-(2-methylpyridin-3-yl)acetamide (CRCM5484, **34**) was prepared by convergent synthesis in  
3 three steps as depicted in scheme 1. A mixture of commercially available *N*-acetyl-4-piperidone,  
4 activated ethyl 2-cyanoacetate and elemental sulfur, was subjected to a *one-pot* Gewald reaction<sup>39</sup> in  
5 presence of triethylamine as base to afford ethyl 6-acetyl-2-amino-4,5,6,7-tetrahydrothieno[2,3-  
6 c]pyridine-3-carboxylate (CRCM5484-2, **34-2**), in good yields. Reacting this latter with 2-furfuryl  
7 isothiocyanate in acetonitrile afforded corresponding 7-acetyl-3-(furan-2-ylmethyl)-2-mercapto-5,6,7,8-  
8 tetrahydropyrido[4',3':4,5]thieno[2,3-d]pyrimidin-4(3H)-one (CRCM5484-1, **34-1**). Finally, condensation  
9 with 2-chloro-*N*-(2-methylpyridin-3-yl)acetamide (CRCM5484-3, **34-3**), previously obtained by reaction  
10 of appropriate substituted aminopyridine with chloroacetyl chloride, afforded the expected THPTP  
11 (CRCM5484, **34**) in 90% yields.

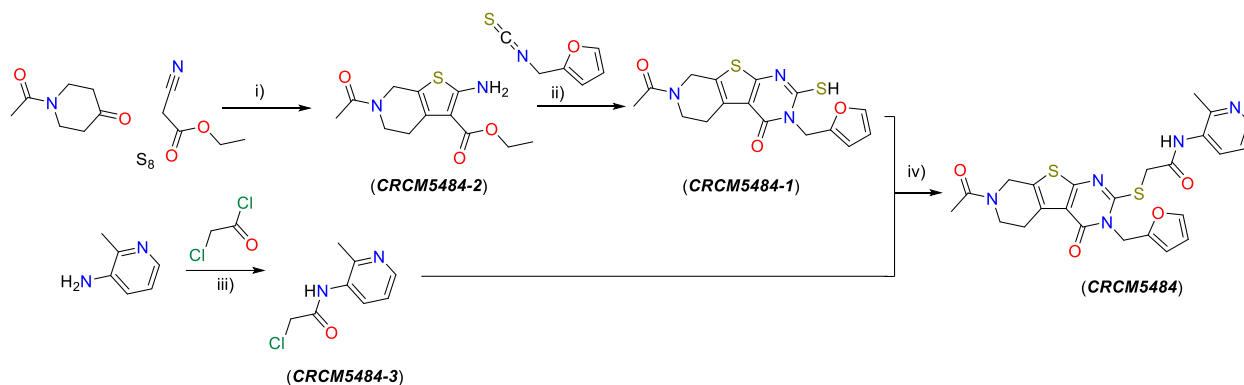

13 **Scheme 1. Reagents and Conditions:** i) TEA, EtOH, reflux, 2h, 74%; ii) 2-furfurylisothiocyanate, K<sub>2</sub>CO<sub>3</sub>, MeCN, reflux, 12h, 10%;  
14 iii) chloroacetyl chloride, TEA, DCM, rt, 5h, 82%; iv) K<sub>2</sub>CO<sub>3</sub>, acetone, reflux, 2h, 90%.

### 15 **CRCM5484, a BDII selective BET inhibitor**

16 CRCM5484 (Figure 3A) exhibited a BDII selective profile with IC<sub>50</sub> values of 130 nM, 20 nM and 71 nM  
17 for the BDIIs and 1300 nM, 9500 nM and 4700 nM for the BDIs of BRD4, BDR3 and BRD2, respectively  
18 (Figure 3B). The affinity for BRD3-BDII was confirmed by isothermal titration calorimetry (ITC) with a 150  
19 nM measured K<sub>D</sub> (Figure 3C). The BROMOscan evaluation at 1μM confirmed the BDII selectivity profile  
20 (Figure 3D and Table S1) and also an overall BET family selectivity across the 32 evaluated domains.

1 From this set of data, only two additional relatively lower affinity binders could be highlighted i.e.  
2 TRIM33 (52%) and CECR2 (54%) as compared to the 36, 37 and 41% inhibition measured for the BDII of  
3 BRD3, BRD2, and BRD4, respectively. A potential impact of these additional binders, either beneficial or  
4 detrimental, cannot be ruled out when assessing the biological effects of CRCM5484. The co-crystal  
5 structure of CRCM5484 in complex with BRD4-BDI and BRD2-BDII was obtained at 1.2 and 1.5 Å  
6 resolution, respectively (Figure 3E). As expected from the SAR study, the binding mode of CRCM5484 is  
7 different than that of the thienopyrimidine derivative compound in the 4ZW1 structure (Figure S3B). For  
8 CRCM5484, the N-acetyl from the tetrahydropyridinyl moiety is anchored in the binding pocket and  
9 mimics the acetylated lysine through direct hydrogen bonds with the key asparagine residues N140 and  
10 N429 in BDI and BDII, respectively. The acetamido group also stabilizes the water network at the bottom  
11 of the pocket. A major conformational change is also observed for CRCM5484 between the two BDs, as  
12 shown in Figure 3E and Figure S5. The picoline bound to BRD4-BDI (marked with an orange star Figure  
13 3F) and the furan to BRD2-BDII (marked with a blue star Figure 3G) showed poor electronic density and  
14 their positioning were driven by geometry and residual electron density during refinement. In the BDII  
15 structure, the picoline moiety occupies the ZA channel and establishes vdW interactions with the WPF  
16 shelf residues W370, P371 and F372. This position is also stabilized by various interactions with water  
17 molecules and other protein residues. In BDI, this moiety is oriented toward the Y139 and N140 amino  
18 acids (Figure 3F and Figure S5A and E). The furyl moiety that we originally linked to the BDII selective  
19 profile does not establish direct interactions with H433, the main hot spot for the development of BDII  
20 selective drugs (Figure 3G and Figure S5C and F). The crystal structure links the BDII selectivity to a  
21 combination of direct or water-mediated anchor points that stabilize the compound in the cavity. In  
22 both structures, the furyl moiety binds a pocket formed by the WPF shelf and an aspartate residue  
23 (D145 for BRD4-BDI and D434 for BRD2-BDII). Altogether, these results confirm the originality of the

- 1 THPTP molecular mode of action in the BD cavity and its potential as a chemical platform for the
- 2 development of potent BD inhibitors.

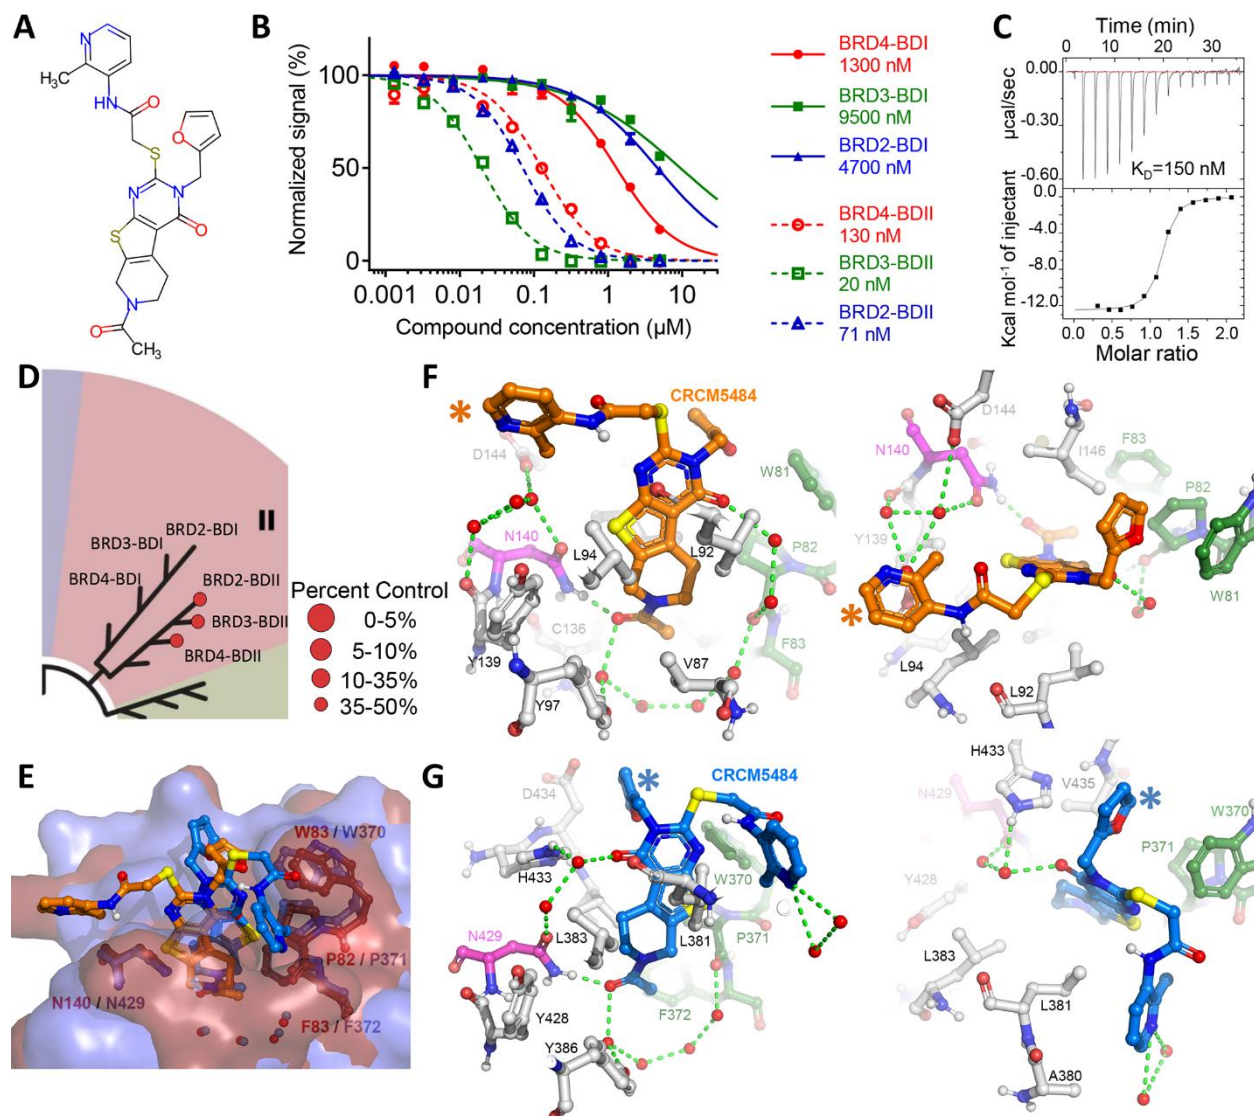

3  
 4 **Figure 3. Characterization of CRCM5484.** (A) Chemical structure. (B) HTRF selectivity assay on the BDI (solid lines) and BDII  
 5 (dashed lines) of BRD2 (blue), BRD3 (green) and BRD4 (red). (C) Representative Isothermal Titration Calorimetry (ITC)  
 6 experiment with CRCM5484 in the cell and BRD3-BDII in the syringe at 15°C. (D) BROMOscan data (DiscoverX) on the 8 BET  
 7 bromodomains families. (E) Superposition of the co-crystal structures of CRCM5484 (orange)/BRD4-BDI (red) (PDB: 7Q3F) and  
 8 CRM5484 (cyan) / BRD2-BDII (blue) (PDB: 7Q50). Water molecules are shown as red and blue spheres for the BRD4-BDI and  
 9 BRD2-BDII complexes, respectively. F and G) Co-Crystal structures of CRCM5484 with BRD4-BDI (Orange) and BRD2-BDII (Blue)  
 10 showing the hydrogen bond interactions as green dotted lines, the canonical asparagine binding residue as magenta, the WPF  
 11 shelf as green and the rest of the domain as white balls and sticks. The picoline (orange \*) and furan moiety (blue \*) showed  
 12 poor electronic density and their positioning were driven by geometry and residual electron density during refinement.

13 **CRCM5484 has similar biological effects as other BDII selective compounds in cell-based assays.**

1 The biological effects of CRCM5484 were evaluated and compared to the reference BDII selective  
2 compounds RVX-208 and GSK046, and the pan-BET inhibitor OTX-015. First, treatment of the MOLM-14  
3 leukemic cell line showed that CRCM5484, similar to RVX-208 and GSK046, exhibited >100x lower  
4 impact on cell growth and viability than that of OTX-015, with EC<sub>50</sub> values of 8.5 μM, 6.7 μM, 14 μM and  
5 0.08 μM, respectively (Figure 4A). Second, the transcriptional impact of these various BD inhibitors on  
6 *MYC* gene expression<sup>40</sup> was compared by quantitative RT-PCR. All tested molecules induced a  
7 concentration-dependent decrease in *MYC* gene expression, with the pan-BET inhibitor displaying the  
8 highest potency (IC<sub>50</sub> = 0.6 μM), and the BDII selective compounds were at least 5x less efficient with IC<sub>50</sub>  
9 values ranging between 3 and 7 μM (CRCM5484) (Figure 4B). These evaluations were replicated in three  
10 additional leukemia cell lines, the known bromodomain inhibitor sensitive CCRF-CEM in addition to  
11 MOLM-14 and the two resistant cell lines, NB4 and K-562. Overall, CRCM5484 and the two other  
12 evaluated BDII selective compounds (RVX-208 and GSK046) displayed little to no cytotoxicity on the 4  
13 cell lines with EC<sub>50</sub> > 5μM, however MOLM-14 and CCRF-CEM cells appeared slightly more responsive to  
14 the drugs (Figure S6A). *MYC* gene expression profile was also similar for these cell lines (Figure S6B). As  
15 BDII inhibition was recently shown to modulate the inflammatory stimulation of gene transcription in  
16 MHC-I antigen presentation pathway gene components<sup>25</sup>, we also evaluated the impact of CRCM5484  
17 on K-562 leukemic cells stimulated with the proinflammatory cytokine interferon-γ (IFN<sub>γ</sub>). As recently  
18 reported, the pan-BET inhibitor totally prevented IFN<sub>γ</sub>-induced expression of MHC-I while CRCM5484  
19 partially inhibited this induction in a concentration-dependent manner, with a similar efficiency to  
20 GSK046 and in agreement with Gilan et al<sup>30</sup> (Figure 4C). Although it cannot be excluded that the two  
21 molecules hold distinct cell penetration capabilities, these results show that CRCM5484 exhibits  
22 comparable activity to the compound GSK046 in these cellular assays.

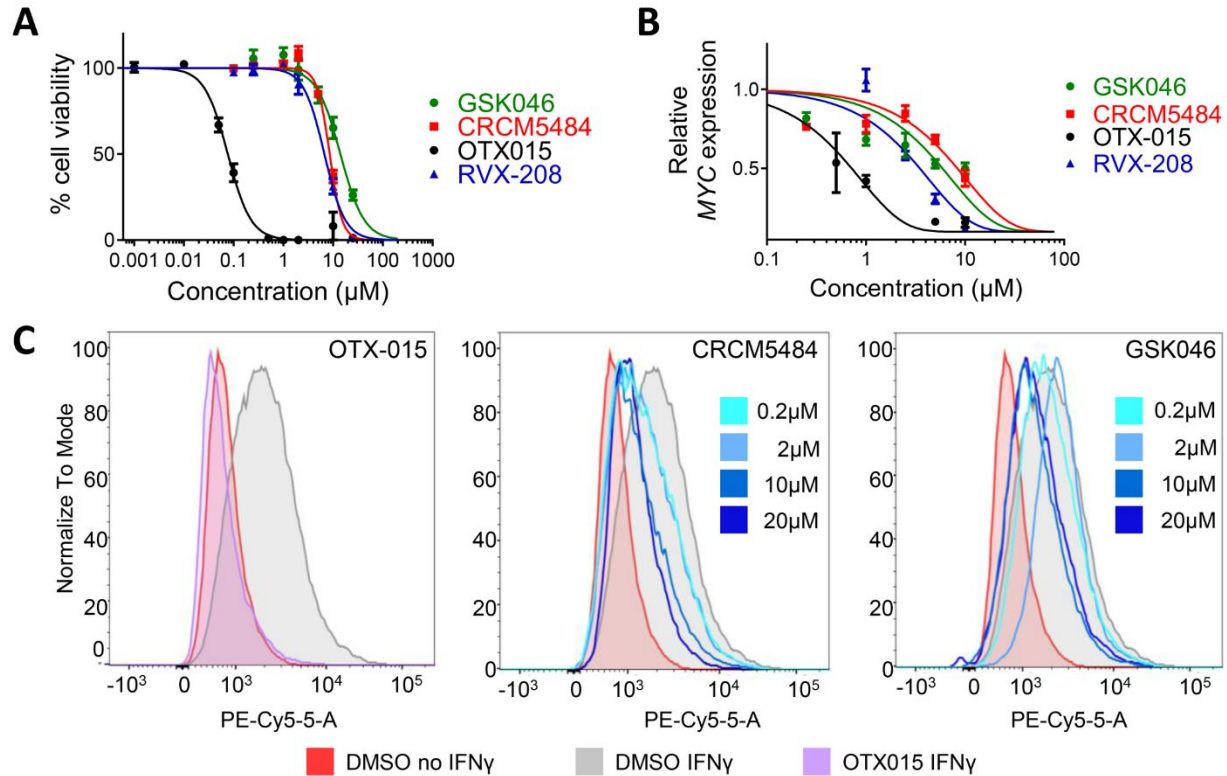

1

2 **Figure 4. CRCM5484 compared to other BDII selective compounds.** (A) Cell viability assay on MOLM-14 leukemic cells  
 3 performed after 72h incubation with OTX015 (black), RVX-208 (blue), GSK046 (green) and CRCM5484 (red). (B) Quantification  
 4 of MYC expression by RT-qPCR following 2h incubation with OTX015 (black), RVX-208 (blue), GSK046 (green) and CRCM5484  
 5 (red). (C) Flow cytometry analysis of MHC-I expression in K-562 cells following stimulation by IFN $\gamma$  and treatment with DMSO,  
 6 OTX015, GSK046 or CRCM5484.

### 7 **Cell- and context-dependent modulation of drug sensitivity of leukemic cells by CRCM5484**

8 Because of the limited impact of BDII selective compounds as single agents in cell viability/growth  
 9 assays, we next questioned the potential to use them in combination with other known compounds  
 10 demonstrating anti-leukemic activity. Using our previously described DSRP platform<sup>41</sup>, CRCM5484 was  
 11 added to 3 distinct leukemia cell lines (MOLM-14, U-937 and CCRF-CEM), as well as to primary patient-  
 12 derived xenografted (PDX) acute myeloid leukemia cells at its 40% effective concentration ( $EC_{40}$ )  
 13 (previously established for each individual cell line and PDX-derived cell cultures, see Table S2 for  
 14 details), in combination with a panel of 78 drugs. Since the biological impact of selective BDII inhibition  
 15 is best evidenced in inflammatory conditions and because drug sensitivity and resistance profiles of  
 16 primary leukemia cell cultures have been shown to be differentially modulated in the presence of bone-



1 marrow-derived stromal cell conditioned medium (BMSC-CM)<sup>42</sup>, PDX-derived leukemia cells<sup>43</sup> were  
2 cultured in both the absence and presence of BMSC-CM. The fold potentiation ratio was then calculated  
3 as the ratio of each tested drug EC<sub>50</sub> value determined in the presence and absence of CRCM5484  
4 (Figure 5A and B). By arbitrarily setting a threshold of potentiation of at least 3-fold, CRCM5484  
5 potentiated the cell viability/growth inhibitory activity of 16 drugs: 10 in MOLM-14, 1 in U-937, 3 in the  
6 CCRF-CEM cell line and 2 in the PDX-derived leukemia cells in the absence of BMSC-CM. CRCM5484-  
7 potentiated drugs varied with the investigated cell cultures, since only 1 out of these 16 drugs, namely  
8 birinapant, was potentiated in at least 3 out of the 4 distinct cell cultures, including PDX-derived  
9 leukemia cells. Strikingly, adding BMSC-CM to the PDX-derived leukemia cell cultures greatly modified  
10 the drug sensitivity and resistance profiles; 7 additional drugs were potentiated >3-fold by CRCM5484  
11 (Figure 5B), but none of these drugs were also potentiated in the established leukemia cell lines (Figure  
12 5A).

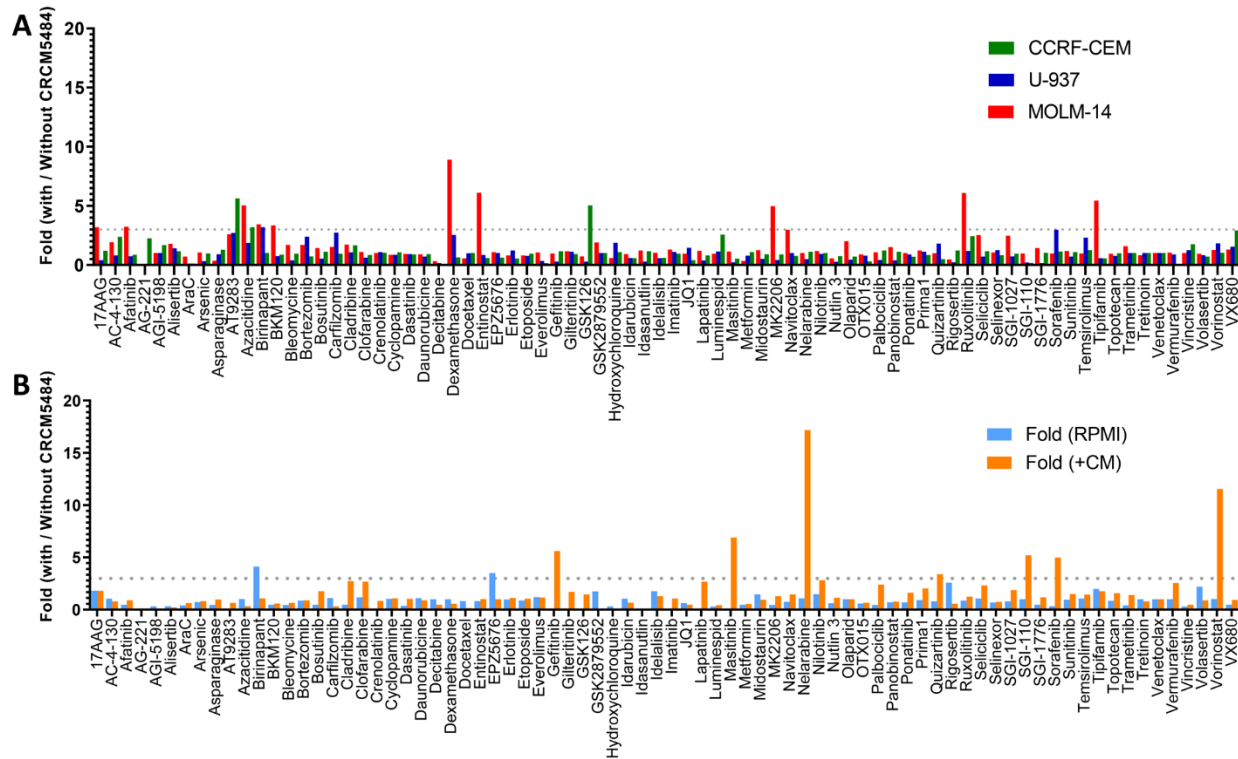

1  
2 **Figure 5. CRCM5484 potentiation of pharmacological agents.** (A) Fold of drug cytotoxic effects with or without CRCM5484 at  
3 its EC<sub>40</sub> (Table S2) in CCRF-CEM (green), U-937 (blue) and MOLM-14 (red) cell lines. (B) Fold of drug cytotoxic effects with or  
4 without CRCM5484 with or without addition of bone-marrow-derived stromal cell conditioned medium (BMSC-CM).

5 To confirm these results on selected drug combinations, we developed dose-response experiments  
6 with combinatorial effects analyses on PDX-derived leukemia cells. First, we focused on birinapant as  
7 the sole drug identified in our screening strategy in 3 out of 4 cell cultures, including PDX-derived  
8 leukemia cells cultured in the absence of BMSC-CM. As shown in figure 6A, a dose-dependent but  
9 limited potentiation of birinapant cell viability/growth inhibitory activity by CRCM5484 was observed,  
10 which was scored as mild additivity to low synergy by Combenefit<sup>44</sup> matrix analysis (Figure 6B). Out of  
11 the 7 drugs in which the anti-leukemic activity was potentiated by CRCM5484 in the presence of BMSC-  
12 CM, we focused on vorinostat. Indeed, for four of these drugs (nelarabine, quizartinib, sorafenib and  
13 gefitinib), the potentiation by CRCM5484 most likely resulted from increased resistance induced by  
14 BMSC-CM, as previously reported<sup>42</sup>. Furthermore, among the remaining three drugs (vorinostat,  
15 masitinib and SG1-110), vorinostat displayed the highest potentiation ratio (11-fold) and has been

1 previously described to synergize with pan-BET inhibitors<sup>45</sup>. Dose-response experiments with  
 2 combinatorial effect analyses confirmed the absence of vorinostat potentiation by CRCM5484 in the  
 3 absence of BMSC-CM (Figure 6C and D) and dose-dependent potentiation in the presence of BMSC-CM  
 4 (Figure 6E and F), which was scored as synergistic by Combenefit matrix analysis at a range of vorinostat  
 5 concentrations that are clinically achievable<sup>46</sup>.  
 6 Altogether, these results support the differential ability of CRCM5484 to potentiate anti-leukemic  
 7 drug activity in a cell and culture condition-dependent manner.

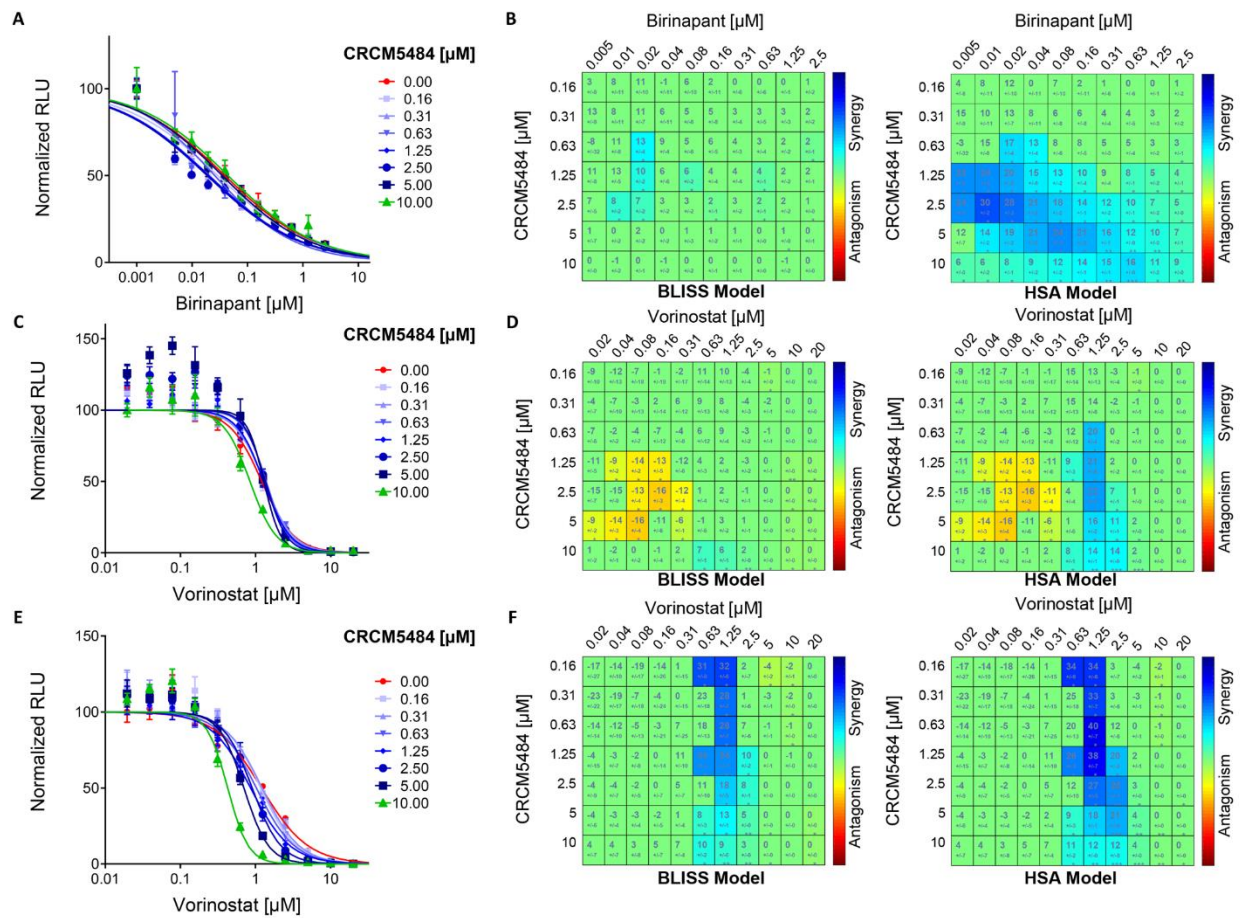

8  
 9 **Figure 6. Validation of CRCM5484 potentiation of pharmacological agents in conditioned medium in the presence/absence of**  
 10 **BMSC-CM.** Dose response curves of birinapant (A) or vorinostat (C and E) cytotoxic effect at a concentration range of  
 11 CRCM5484 in the absence (A and C) or the presence (E) of BMSC-CM. Combination effect matrix between birinapant (B) and  
 12 vorinostat (D and F) in combination with CRCM5484 analyzed using the BLISS (right) and HSA model (left) in the absence (B and  
 13 D) or the presence (F) of BMSC-CM. The synergy/antagonism score and its statistical significance is specified for each  
 14 combination. Significant combinations are colored in an antagonism/synergy scale (red to blue) and stars indicate the level of  
 15 significance.

## 1 DISCUSSION AND CONCLUSIONS

2 The development of selective BDI and/or BDII compounds has been strongly motivated by the  
3 encouraging results of first-generation pan-BET inhibitors in various clinical trials, which have even led to  
4 remissions in some cancer patients<sup>47-49</sup>. However, the initial enthusiasm was rapidly tempered by the  
5 short response durations observed at tolerated doses and the description of resistance mechanisms that  
6 may contribute to these limitations. Therefore, developing more selective molecules was quickly  
7 proposed as well as evaluating combinations with standard treatments and/or other targeted therapies  
8 to reduce side effects while improving efficacy. Designing inhibitors with a selective profile could also  
9 lead to a better understanding of the role played by each domain in the BD family, which is currently  
10 under debate, and to propose new original chemistry-based molecules that could be developed as drug  
11 candidates.

12 In this study, we describe how a differential screen of BDI and BDII domains of the BET family against  
13 our in-house “Fr-PPICChem” chemical library led to the identification of a BD binder with a preference for  
14 BDII of the BRD3 and BRD2 proteins from the BET family. This compound has an original selectivity  
15 profile based on a THPTP core and has not been previously described as a BD binder in the literature. To  
16 optimize this screening hit, a series of five compounds was first purchased during SAR by a catalog  
17 campaign, and the molecular mode of action of the best compounds was investigated. The acetamido  
18 group appeared to be crucial for compound anchoring in the binding pocket while the furyl moiety was  
19 responsible for the selectivity profile.

20 In a second series of nineteen compounds, phenyl substitution could adjust the affinity of the  
21 compounds to BDs, and we observed that substitutions in the -Para position, such as ethoxy, methoxy,  
22 methyl, chloro or fluoro groups decreased compound affinity with an  $IC_{50} > 500$  nM on BRD3-BDII. We  
23 predicted that the best compounds of the series established additional hydrogen bonds with a hydrogen  
24 bond donor or acceptor in the -Ortho position on the phenyl ring. Within this series, compound **16**

1 exhibited the best inhibitory potential with IC<sub>50</sub> values measured at 2200 and 72 nM for the BDI and BDII  
2 of BRD3 respectively, and a 31-fold selectivity ratio.

3 A last step in the chemical synthesis aimed at improving the compound selectivity and solubility and  
4 led to CRCM5484, our lead compound that bears a picoline moiety instead of the initial aryl moiety. This  
5 compound is a BDII selective inhibitor that exhibits a similar activity in TR-FRET to GSK046 or RVX-208,  
6 the reference BDII selective compounds in the literature. Comparative analysis of the X-Ray structures of  
7 CRCM5484 in complex with BRD4-BDI and BRD2-BDII supported the observations from the SAR by  
8 catalog and revealed that the compound was rotated by 180° in the cavity. In BRD4-BDI, the picoline  
9 moiety established no interaction with the protein, while in BDII, the picoline moiety was stabilized by  
10 vdW contacts in the protein WPF shelf region.

11 We then evaluated the activity of our THPTP-based BDII inhibitor in a variety of cell-based assays, in  
12 comparison with two reference BDII selective inhibitors: the recently developed GSK046<sup>30</sup>, and RVX-208,  
13 the earliest described BDII compound<sup>14</sup>. Consistent with the activities reported for the latter  
14 compounds, when used as a single agent, CRCM5484 presented a weak impact on the  
15 viability/proliferation of the leukemic MOLM-14 cell line (as well as U-937 and CCRF-CEM) with EC<sub>50</sub>  
16 values >100x compared to those of the pan-BET compound OTX-015, as well as a limited impact on the  
17 maintenance of *MYC* gene transcription, a well-documented transcriptional target of BET inhibitors.

18 In parallel, the work of Gilan *et al* demonstrated the contributions of BDII to the transcriptional  
19 induction of genes, and BDII notably controlled the cell surface expression of the MHCI complex by  
20 inflammatory cytokines and its modulation by the BDII selective compound GSK046. Consistent with  
21 these observations, our results demonstrate that CRCM5484 modulates IFN<sub>γ</sub>-induced MHCI expression  
22 in a manner comparable to that of GSK046 but is less efficient than the pan-BET inhibitor OTX-015.

23 Based on these observations, we then assessed the ability of CRCM5484 to potentiate the anti-  
24 leukemic activity of a panel of 78 drugs with marketing authorization and/or in clinical development.

1 Our screening approach highlights several observations. First, when CRCM5484 is added in a single dose  
2 corresponding to its previously measured EC<sub>40</sub> in each of the cell models evaluated, the antiproliferative  
3 activity of the tested drugs was potentiated up to 9-fold, depending on the cell line and including  
4 primary AML cells derived from a PDX. Second, the drugs potentiated by CRCM5484 varied greatly  
5 depending on the cell line evaluated and the presence of inflammatory conditioned medium from bone  
6 marrow stromal cells for the test performed on primary PDX-derived AML cells (up to 17-fold increased  
7 antiproliferative activity for the later). Third, the selection of the two drugs with the best combination  
8 potential confirmed the potentiation effect of CRCM5484 in dose-response experiments, which were  
9 performed on primary PDX-derived AML cells with additivity/low synergy effects in combination with  
10 birinapant and synergy effects in combination with vorinostat, in the presence of conditioned medium  
11 from bone marrow stromal cells.

12 To our knowledge, these results are the first illustration of a combination effect of BET inhibitors with  
13 birinapant, a second mitochondrial-derived activator of caspases (SMAC) mimetic, in which the rationale  
14 for the combination effect remains to be unveiled and better documented. It should be noted that  
15 although this potentiation was observed for two of the three cell lines as well as the primary AML cells  
16 from our PDX model, it was not observed for the latter in the presence of BMSC-CM.

17 The potentiation effect of the histone deacetylase inhibitor vorinostat by pan-BET inhibitors has  
18 recently been reported in cutaneous T-cell lymphoma<sup>50</sup>. However, it is important to note that this effect  
19 was only observed for primary AML cells from our PDX model and in the presence of BMSC-CM. It  
20 therefore seems important to confirm these observations and in particular to extend them to a panel of  
21 primary AML samples.

22 Nevertheless, our results provide motivation to further explore the capacities of CRCM5484 and, more  
23 broadly, selective BDII inhibitors to potentiate the anti-leukemic activity of FDA-approved drugs or

1 molecules in development; and the inhibitors should be examined in terms of the potentially reduced  
2 side effects due to their better selectivity in various preclinical cancer models.

### 3 EXPERIMENTAL SECTION

#### 4 **Chemistry**

5 For chemical synthesis, all compounds are >95% pure by HPLC analysis. The Table S3 summarizes all  
6 compounds information (SMILES, CAS, provider, and provider ID). Quality evaluations as provided by the  
7 company (NMR/HPLC) for all purchased compounds are included as supplementary files. Commercially  
8 available reagents and solvents were used without further additional purification. Thin layer  
9 chromatography (TLC) was performed on precoated aluminum sheets of silica (60 F254 nm, Merck) and  
10 visualized using short-wave UV light. Reaction monitoring and purity of synthesized compounds were  
11 recorded by using analytical Agilent Infinity high performance liquid chromatography (HPLC) with DAD at  
12 254 nm column Agilent Poroshell 120 EC-C18 2.7 $\mu$ m (4.6 x 50 mm), mobile phase (A: 0.1% FA H<sub>2</sub>O, B:  
13 0.1% FA MeCN), flow rate 0.3 mL/min, time/%B 0/10, 4/90, 7/90, 9/10, 10/10. Column chromatography  
14 was performed on a Reveleris purification system using Reveleris Flash silica cartridges. Petroleum refers  
15 to the fraction with distillation range 40-65 °C. <sup>1</sup>H and <sup>13</sup>C NMR spectra were recorded by using a Bruker  
16 AC 400 spectrometer. Chemical shifts, ( $\delta$ ) are reported in ppm and coupling values (*J*) in hertz.  
17 Abbreviations for peaks are, br: broad, s: singlet, d: doublet, t: triplet, q: quadruplet, quint: quintuplet,  
18 sext: sextuplet, sept: septuplet and m: multiplet). The spectra recorded are consistent with the  
19 proposed structures. Low-resolution mass spectra were obtained with Agilent SQ G6120B mass  
20 spectrometer in positive and negative electrospray mode.

#### 21 **Ethyl 6-acetyl-2-amino-4,5,6,7-tetrahydrothieno[2,3-c]pyridine-3-carboxylate (CRCM5484-2, 34-2)<sup>51</sup>.**

22 To a suspension of ethyl 2-cyanoacetate (5.66 g, 50 mmol), *N*-acetyl-4-piperidinone (5.71 g, 50 mmol),  
23 triethylamine (7 mL, 50 mmol) and sulfur (1.60 g, 50 mmol) in ethanol (100 mL) was heated at 70 °C for  
24 2 h. The resulting mixture was concentrated under reduced pressure and the residue was successively

1 diluted with DCM (100 mL), washed with H<sub>2</sub>O (2 x 30 mL), brine (30 mL), and dried over Na<sub>2</sub>SO<sub>4</sub>. The  
2 solvent was distilled off under reduced pressure and the crude product was purified by crystallization  
3 from Et<sub>2</sub>O to afford ethyl 6-acetyl-2-amino-4,5,6,7-tetrahydrothieno[2,3-c]pyridine-3-carboxylate  
4 **CRCM5484-2** (10 g, 75%), as a yellow powder. <sup>1</sup>H NMR (400 MHz, CDCl<sub>3</sub>) δ 4.71 (brs, 2H), 4.52-4.37 (m,  
5 2H), 4.26 (q, *J* = 7.2 Hz, 2H), 3.79-3.65 (m, 2H), 2.86 (brs, 2H), 2.17 (brs, 3H), 1.36 (t, *J* = 7.2 Hz, 3H); LCMS  
6 C<sub>12</sub>H<sub>16</sub>N<sub>2</sub>O<sub>3</sub>S Rt = 6.908 min, ESI+ *m/z* = 269.1 (M+H).

7 **7-Acetyl-3-(furan-2-ylmethyl)-2-mercapto-5,6,7,8-tetrahydropyrido[4',3':4,5]thieno[2,3-d]pyrimidin-**  
8 **4(3H)-one (CRCM5484-1, 34-1)**. To a solution of **CRCM5484-2** (5.36 g, 20 mmol) and 2-furfuryl  
9 isothiocyanate (2.76 g, 20 mmol) in acetonitrile (50 ml), was added anhydrous potassium carbonate  
10 (2.76 g, 20 mmol). The resulting mixture was heated under reflux overnight. After cooling down at room  
11 temperature, the precipitate formed was filtered off, and resuspended, under stirring, in 2N HCl  
12 aqueous solution (30 mL) for 15 min. The solid was collected by filtration to afford the 7-acetyl-3-(furan-  
13 2-ylmethyl)-2-mercapto-5,6,7,8-tetrahydropyrido[4',3':4,5]thieno[2,3-d]pyrimidin-4(3H)-one  
14 **CRCM5484-1** (700 mg, 10%), as a light yellow powder. <sup>1</sup>H NMR (400 MHz, DMSO) δ 13.71 (brs, 1H), 7.54  
15 (d, *J* = 1.2 Hz, 1H), 6.37 (dd, *J* = 3.1, 1.2 Hz, 1H), 6.31 (d, *J* = 3.1 Hz, 1H), 5.57 (s, 2H), 4.64 (s, 0.5H), 4.59 (s,  
16 1.5H), 3.71-3.67 (m, 2H), 2.94 (t, *J* = 5.4 Hz, 1.5H), 2.81 (t, *J* = 5.4 Hz, 0.5H), 2.10 (s, 2.25H), 2.05 (s,  
17 0.75H); LCMS C<sub>16</sub>H<sub>15</sub>N<sub>3</sub>O<sub>3</sub>S<sub>2</sub> Rt = 7.145 min, ESI+ *m/z* = 362.1 (M+H).

18 **2-Chloro-N-(2-methylpyridin-3-yl)acetamide (CRCM5484-3, 34-3)**<sup>52</sup>. At room temperature, to a  
19 solution of 3-amino-2-methylpyridine (2.16 g, 20 mmol) in dichloromethane (20 mL), were successively  
20 added chloroacetyl chloride (1.6 mL, 20 mmol) and triethylamine (2.79 mL, 20 mmol). The resulting  
21 mixture was stirred for 5 h, and concentrated under reduced pressure. The residue was purified by  
22 column chromatography, eluent DCM-MeOH (80:20) to afford the 2-chloro-*N*-(2-methylpyridin-3-  
23 yl)acetamide **34-3**. (3.02 g, 82%), as a white powder. LCMS C<sub>8</sub>H<sub>9</sub>ClN<sub>2</sub>O Rt = 2.179 min, ESI+ *m/z* = 185.1  
24 (M+H).



1        **2-((7-Acetyl-3-(furan-2-ylmethyl)-4-oxo-3,4,5,6,7,8-hexahydropyrido[4',3':4,5]thieno[2,3-**  
2 **d]pyrimidin-2-yl)thio)-N-(2-methylpyridin-3-yl)acetamide (CRCM5484, 34).** To a suspension of  
3 **CRCM5484-1** (181 mg, 0.5 mmol) and anhydrous potassium carbonate (170 mg, 1.23 mmol) in dry  
4 acetone (15 mL) was added **CRCM5484-3** (139 mg, 0.75 mmol). The resulting mixture was refluxed for 1  
5 h and concentrated under reduced pressure. The residue was purified by column chromatography,  
6 eluent DCM-MeOH (95:5) to afford the 2-((7-acetyl-3-(furan-2-ylmethyl)-4-oxo-3,4,5,6,7,8-  
7 hexahydropyrido[4',3':4,5]thieno[2,3-d]pyrimidin-2-yl)thio)-N-(2-methylpyridin-3-yl)acetamide  
8 **CRCM5484** (230 mg, 90%), as a white powder. CRCM5484 purity was analyzed by HPLC as shown in  
9 Figure S7A. <sup>1</sup>H NMR (400 MHz, CDCl<sub>3</sub>) δ 8.71 (brs, 1H), 8.36-8.31 (m, 1H), 8.27 (d, *J* = 5.1 Hz, 1H), 7.35  
10 (brs, 1H), 7.22 (dd, *J* = 8.1, 5.1 Hz, 1H), 6.45 (d, *J* = 3.2 Hz, 1H), 6.33 (dd, *J* = 3.2, 1.9 Hz, 1H), 5.35 (s, 2H),  
11 4.77 (s, 1.5H), 4.64 (s, 0.5H), 4.11 (s, 2H), 3.88 (t, *J* = 5.6 Hz, 0.5H), 3.74 (t, *J* = 5.6 Hz, 1.5H), 3.16 (t, *J* = 5.6  
12 Hz, 1.5H), 3.10 (t, *J* = 5.6 Hz, 0.5H), 2.43 (s, 3H), 2.21 (s, 2.25H), 2.19 (s, 0.75H); <sup>13</sup>C NMR (10 MHz, CDCl<sub>3</sub>)  
13 δ 169.53, 169.40, 166.59, 166.53, 161.69, 157.39, 157.21, 157.06, 156.86, 149.48, 149.34, 147.70,  
14 145.29, 142.81, 132.14, 131.48, 130.29, 130.22, 129.63, 128.77, 126.97, 121.76, 118.72, 118.57, 110.65,  
15 110.51, 110.43, 45.23, 43.51, 41.13, 40.53, 38.68, 36.44, 26.14, 25.26, 22.03, 21.42, 20.90; LCMS  
16 C<sub>24</sub>H<sub>23</sub>N<sub>5</sub>O<sub>4</sub>S<sub>2</sub> Rt = 6.298 min, ESI+ *m/z* = 510.1 (M+H) as shown in Figure S7B, >98% pure.

### 17        **Protein expression and purification**

18        For homogeneous time resolved fluorescence (HTRF) experiments, all 6 BDs of BRD4, BRD3 and BRD2  
19 (3 BDI and 3 BDII domains) synthetic genes that include a Tobacco Etch Virus (TEV) cleavage site were  
20 purchased from LifeTechnology in a pDONR transport vector before cloning into a pDEST<sup>TM</sup>15 expression  
21 vector for GST affinity purification. Protein production and purification was carried out using similar  
22 protocols and buffers used for the His-BRD4-BDI system. Purification was carried on GST affinity resin  
23 (Thermo Scientific) and reduced glutathione was used for protein release. GST-BRD4-BDI was further

1 purified by size exclusion chromatography on a Superdex 16/60 Hilo column (GE Healthcare) using 20  
2 mM TRIS pH=8.0, 150 mM NaCl Buffer.

3 For isothermal titration calorimetry (ITC), BRD3-BDII was produced and purified using a histidine tag  
4 affinity chromatography from a pDEST<sup>TM</sup>17 expression vector containing a TEV protease cleavage site.  
5 After size exclusion chromatography, fractions presenting pure BRD3-BDII were pooled and  
6 concentrated to 7 mg/mL in 10 mM HEPES pH=7.5, 150 mM NaCl, 1mM DTT buffer. A final step of buffer  
7 exchange was performed using a PD10 column from GE healthcare prior to the experiment to remove  
8 the DTT.

9 For X-Ray crystallography, BRD4-BDI was produced and purified using a histidine tag affinity  
10 chromatography as described by Filipakopoulos et al<sup>49</sup>. For these experiments, a pNIC28-BSA4  
11 expression vector containing BRD4-BDI and a TEV protease cleavage site has been kindly provided by  
12 Stefan Knapp laboratory from the SGC at the University of Oxford. After size exclusion chromatography,  
13 fractions of pure BRD4-BDI after TEV cleavage of the histidine tag were pooled and concentrated to 25  
14 mg/mL.

15 For X-Ray crystallography, BRD2-BDII was produced from a pDEST<sup>TM</sup>17 expression vector containing a  
16 TEV protease cleavage site and purified using a histidine tag affinity chromatography. After size  
17 exclusion chromatography, fractions of pure BRD2-BDII after TEV cleavage were pooled and  
18 concentrated to 20 mg/mL.

### 19 **Homogeneous Time-Resolved Fluorescence**

20 HTRF assays were performed in white 1536 Well Small Volume<sup>TM</sup> HiBase Polystyrene Microplates  
21 (Greiner) with a total working volume of 4  $\mu$ L using the conditions described in Table S4. 5 nL of  
22 compounds were dispensed (2 x 2.5 nL fixed dispensing using an Echo550 (Labcyte)) from a  
23 concentration stock of 1 mM (100% DMSO) for the Fr-PPIchem primary screening after addition of 15 nL  
24 DMSO per well to reach the final 1.25 $\mu$ M concentration used in the assay (0.5% final DMSO). Dose

1 response evaluations of commercial and synthesized compounds were performed similarly from 10 mM  
2 stock solutions (100% DMSO). For the screening, the inhibition percentage was calculated and compared  
3 to the reference compound, JQ1. The IC<sub>50</sub> measurements were carried out in triplicates. All HTRF  
4 reagents were purchased from CisBio Bioassays and reconstituted according to the supplier protocols.  
5 HTRF signals were measured, after a final incubation (6h at room temperature), using a PHERAstar FS  
6 (BMG Labtech) with an excitation filter at 337 nm and fluorescence wavelength measurement at 620  
7 and 665 nm, using an integration delay of 60 μs and an integration time of 500 μs. Results were analyzed  
8 with a two-wavelengths signal ratio: [intensity (665 nm)/intensity (620 nm)]\*10<sup>4</sup>. Percentage of  
9 inhibition was calculated using the following equation: % inhibition = [(compound signal) - (min signal)] /  
10 [(max signal) - (min signal)] \* 100, where 'max signal' is the signal ratio with the compound vehicle alone  
11 (DMSO) and 'min signal' the signal ratio without peptide. For IC<sub>50</sub> measurements, values were  
12 normalized and fitted with Prism (GraphPad) using the following equation:  $Y = 100 / (1 + ((X / IC_{50})^{Hill$   
13  $slope}))$ .

#### 14 **BROMOscan**

15 BROMOscan bromodomain profiling was provided by Eurofin DiscoverX Corp. Determination of the K<sub>D</sub>  
16 between test compounds and DNA tagged bromodomains was achieved through binding competition  
17 against a proprietary reference immobilized ligand. CRCM5484 was used at 1μM.

#### 18 **Isothermal Titration Calorimetry**

19 ITC was used to evaluate the thermodynamics parameters of the binding between BRD4-BDI, BRD2-  
20 BDI and BRD3-BD2 and CRCM5484, using ITC conditions previously described by Filippakopoulos et al<sup>53</sup>.  
21 Purified proteins were extensively dialyzed in the ITC buffer containing 10mM Hepes pH=7.5 and 150  
22 mM NaCl. Compound was diluted directly in the last protein dialysate prior to experiments. Titrations  
23 were carried out on a MicroCal ITC200 microcalorimeter (GE Healthcare, Piscataway, NJ). Each  
24 experiment was designed using a titrant concentration (protein in the syringe) set 10 to 15 times the

1 analyte concentration (compound in the cell generally between 10 and 35  $\mu\text{M}$ ) and using 13 injections at  
2 15  $^{\circ}\text{C}$ . A first small injection (generally 0.2  $\mu\text{L}$ ) was included in the titration protocol to remove air  
3 bubbles trapped in the syringe prior titration and/or take into account syringe predilution in the cell  
4 during equilibration. Raw data were scaled after setting the zero to the titration saturation heat value.  
5 Integrated raw ITC data were fitted to a one site non-linear least squares fit model using the MicroCal  
6 Origin plugin as implemented in Origin 7 (Origin Lab). Finally,  $\Delta\text{G}$  and  $\text{T}\Delta\text{S}$  values were calculated from  
7 the fitted  $\Delta\text{H}$  and  $\text{K}_\text{A}$  values using the equations  $\Delta\text{G} = -\text{R}\cdot\text{T}\cdot\ln\text{K}_\text{A}$  and  $\Delta\text{G} = \Delta\text{H} - \text{T}\Delta\text{S}$ .

### 8 **X-Ray crystallography**

9 BRD4-BDI/CRCM5484 and BRD2-BDII/CRCM5484 co-crystallizations were performed at respectively,  
10 4 $^{\circ}\text{C}$  (277 K) and 12  $^{\circ}\text{C}$  (285 K) using the hanging drop vapor diffusion method. For the BRD4-  
11 BDI/CRCM5484, a solution of 25 mg/mL of BRD4-BDI with 1mM of compound was mixed at a 1:1 ratio  
12 with the precipitant solution (300 mM  $\text{NaNO}_3$ , 16% PEG3350, 5% Ethylene glycol) and crystals grew to  
13 diffracting quality within 3-5 days.

14 For the BRD2-BDII/CRCM5484 complex, 20 mg/mL of BRD2-BDII and 2.5 mM of compound CRCM5484  
15 preparation was mixed at a 1:1 ratio with the precipitant solution (25% PEG3350, 100 mM potassium  
16 thiocyanate) and crystals grew to diffracting quality within 10 days. Crystals grew to diffracting quality  
17 within 1 month.

18 Crystals were cryo-protected using the precipitant solution supplemented with 10% ethylene glycol  
19 and were flash frozen in liquid nitrogen. Data were collected at the ESRF beamlines ID30A-1 and at the  
20 SOLEIL beamline Proxima1. Indexing, integration, and scaling were performed using XDS. Initial phases  
21 were calculated by molecular replacement with Phaser MR (CCP4 suite) using a model of the first  
22 domain of BRD4 (extracted from the Protein Data Bank accession code: 2OSS); for BRD2-BDII, using a  
23 model extracted from the Protein Data Bank accession code: 5XHK. Initial models for the protein and the  
24 ligands were built in COOT. The cycles of refinement were carried out with phenix.refine (Phenix v1.13).

1 Data collection and refinement statistics can be found in Table S5. The models and structures factors  
2 have been deposited with Protein Data Bank accession code for BRD4-BDI in complex with compound  
3 CRCM5484: 7Q3F, and BRD2-BDII in complex with the compound CRCM5484: 7Q5O.

#### 4 **Cell culture**

5 The human leukemia cell lines U-937, CCRF-CEM and K-562 were cultured in RPMI 1640  
6 supplemented with 10% FBS. MOLM-14 were cultured in MEMalpha supplemented with 10% FBS. NB4  
7 were cultured in Dulbecco's Modified Eagle Medium supplemented with 10% FBS. All cell lines were  
8 incubated at 37°C with 5% CO<sub>2</sub>, were diluted every 2 to 3 days and maintained in an exponential growth  
9 phase. These cell lines have been routinely tested for mycoplasma contamination.

#### 10 **Cell viability assay**

11 MOLM-14, NB4, CCRF-CEM and K562 were seeded at 4000, 5000, 8000 and 6000 cells/well in 96-well  
12 plates, respectively. After 24h, cells were treated with a range of concentrations of CRCM5484, OTX015,  
13 RVX208 or GSK046 and after 72h drug incubation, metabolic activity was detected by addition of Alamar  
14 blue and spectrophotometric analysis using a PHERAstar plate reader (BMG labtech). Cell viability was  
15 determined and expressed as a percentage of untreated control cells. The determination of IC<sub>50</sub> values  
16 was performed by using the following equation:  $Y=100/(1+((X/IC_{50})^{Hillslope}))$ .

#### 17 **MYC gene expression analysis by RT-qPCR**

18 MOLM-14 cells were treated with a range of concentrations of CRCM5484, OTX-015, RVX-208 or  
19 GSK046 for 2h. NB4, CCRF-CEM and K-562 cells were treated with 1 μM of OTX-015, 5 μM of CRCM5484,  
20 5 μM of GSK046 or 5 μM of RVX-208 for 2h. RNA extraction was performed using RNeasy kit (Qiagen).  
21 OneScript® Plus cDNA Synthesis Kit (abm) was used to prepare cDNA from purified RNA. Real-time qPCR  
22 was performed using SsoAdvanced Universal SYBR® Green Supermix (Bio-Rad) and a CFX384™ Real-  
23 Time System device (Bio-Rad). Analysis performed on duplicate PCR data per biological replicate. Four  
24 biological replicates were used for DMSO, CRCM5484, GSK046, RVX208 and OTX015 treated cells. *MYC*

1 gene expression level was determined using the  $\Delta\Delta C_t$  method, normalized to *GAPDH* control gene, using  
2 pre-designed KiCqStart™ primers (H\_MYC\_1, H\_GAPDH\_1; Merck).

### 3 Inhibition of MHC expression

4 The MHC-I expression was carried out by fluorescence-activated cell sorting analysis using antibodies  
5 against HLA-A/B/C (HLA-ABC Monoclonal Antibody (W6/32), PE-Cyanine5, eBioscience) in K-562 cells  
6 after stimulation with IFN- $\gamma$  (10 ng/ml, PHC4031 life technologies) and treatment with DMSO, OTX-015,  
7 CRCM5484, or GSK046 for 48 hours. Following incubation and washing, samples were analyzed on a LSR  
8 II flow cytometer (Becton Dickinson) using flowjo V-10.8.1 software.

### 9 **Drug sensitivity and resistance assays**

10 The drug screening library included 78 substances consisting of conventional chemotherapeutics and  
11 a broad range of targeted oncology compounds. Each drug was plated on 96-well plates at 4  
12 concentrations covering a 1000-fold concentration range. 10-20000 cells were seeded per well in 96-  
13 well plates and incubated in the presence of compounds (4 concentrations generated after a 1 log serial  
14 dilution from the starting concentration defined in Table S2 for each drug/cell line) in presence or  
15 absence of CRCM5484 in a humidified environment at 37°C and 5% CO<sub>2</sub>. After 72h (cell lines) - 144h  
16 (PDX) of treatment, cell viability was measured using the CellTiter-Glo Luminescent Cell Viability Assay as  
17 described by the manufacturer (Promega Corporation). The Luminescence was measured using a Centro  
18 luminometer LB960 (Berthold). Effective half-maximal concentration values (EC<sub>50</sub>) were deduced from  
19 dose-response curves obtained using GraphPad Prism 6 software (GraphPad Software, Inc.). Primary  
20 AML cells were collected after two passages in mice from a previously described Patient-Derived  
21 Xenograft mouse model<sup>43</sup> and were cultured with RPMI 20% FBS, 50% bone-marrow-derived stromal cell  
22 conditioned medium (HS-5 Cell line) or RPMI 20% FBS, as described<sup>39</sup>.

### 23 **Synergy assays**

1 Median effect analysis was performed through Combenefit software (Bioinformatics Advance Access  
2 published May 28, 2016) based on Chou and Talalay method using growth inhibition obtained from  
3 CellTiter-Glo luminescent assay. The combination effect was compared to the cytotoxicity of each drug  
4 alone. We performed combination analyses using Bliss and HSA methods. The drug interactions were  
5 specified using Matrix Synergy Plot. The synergy assays were carried out in triplicates

## 6 **ASSOCIATED CONTENT**

### 7 **Supporting Information**

8 See figures S1 to S7 and Tables S1 to S5:

9 Figure 1: HTRF evaluation of the FR-PPICChem screening hits, Figure 2: chemical structures, Figure 3:  
10 binding mode comparison between CRCM5484 and 4ZW1, Figure 4: selectivity evaluation of compound  
11 **12** and compound **16**, Table 1: BROMOScan evaluation of CRCM5484, Figure 5: binding mode study of  
12 CRCM5484, Table 2: maximal concentration used for the 78 evaluated compounds in the drug sensitivity  
13 and resistance profiling; Figure 6: CRCM5484 HPLC analysis; Table 3: Compounds SMILES, Provider,  
14 Provider ID and CAS number; Table 4: HTRF experimental conditions, Table 5: X-ray data collection and  
15 refinement statistics. Quality evaluations as provided by the company (NMR/HPLC) are included as  
16 supplementary files (file Carrasco-et-al-Providers.zip) for all purchased compounds. CSV file listing  
17 compounds formula strings with their associated biochemical and biological data (Carrasco-et-al-  
18 Data.csv). This material is available free of charge via the Internet at <http://pubs.acs.org>.

## 19 **AUTHOR INFORMATION**

### 20 **Corresponding Authors**

21 \*Email: [stephane.betzi@inserm.fr](mailto:stephane.betzi@inserm.fr). Phone: +33 (0)4 86 97 73 33. ORCID Number: 0000-0001-5935-

22 5058

23 \*Email: [yves.collette@inserm.fr](mailto:yves.collette@inserm.fr). Phone: +33 (0)4 86 97 73 31. ORCID Number: 0000-0001-5359-7099

1 \*Email: [xavier.morelli@inserm.fr](mailto:xavier.morelli@inserm.fr). Phone: +33 (0)4 86 97 73 31. ORCID Number: 0000-0001-8101-7901

## 2 **Author Contributions**

3 K.C. and C.D. carried out the small molecules screen; K.C. and S.B. performed the biochemical and  
4 biophysical evaluation; Chemical synthesis was performed by S.C. and J.C.; P.R. and L.H. performed the  
5 chemoinformatics and molecular modeling analysis; C.M., K.C., E.P. and A.R. carried out the cellular  
6 evaluations. The manuscript was written through contributions of all authors. S.B., Y.C. and X.M.  
7 supervised and conceived the project. All authors have given approval to the final version of the  
8 manuscript.

## 9 **PDB ID CODES**

10 PDB codes for BRD4-BDI and BRD2-BDII with bound CRCM5484 are 7Q3F and 7Q5O. Authors will  
11 release the atomic coordinates upon article publication.

## 12 **ACKNOWLEDGMENTS**

13 This study was partly supported by research funding from the "Canceropôle PACA", "Institut National  
14 du Cancer" and "Région Provence-Alpes-Côte d'Azur" ("Prematuration Grant" 2017 attributed to X.M. &  
15 "Emergence Grant" 2017 attributed to E.P) and from the "Fondation ARC" (PJA 20171206125 grant  
16 attributed to X.M.), K.C. was supported by a fellowship from the "Fondation ARC". We would like to  
17 thank the FRISBI ANR-10-INSB-05-01 grant for access time on the structural-biology platform of the  
18 AFMB laboratory. We acknowledge the European Synchrotron Radiation Facility and the SOLEIL  
19 synchrotron for provision of synchrotron radiation facilities and the staff at beamline ID30A-1, Proxima1  
20 and Proxima2. We thank the HiTS, TrGET and flow cytometry platforms of the CRCM and their staff. We  
21 thank Dr Etienne Rebuffet from iSCB team for fruitful discussions about our structural data.

22



1     **ABBREVIATIONS**

2     BET, Bromodomain and Extra-Terminal; BD, Bromodomain; PPI, Protein-Protein Interactions; ITC,  
3     Isothermal Titration Calorimetry; PAINS, Pan-Assay Interference Compounds; HTS, High-Throughput  
4     Screen; THPTP, tetrahydropyridothienopyrimidinone; SAR, Structure Activity Relationship; DSRP, Drug  
5     Sensitivity Response Profile; HTRF, Homogeneous Time-Resolved Fluorescence; IFN<sub>γ</sub>, Pro-Inflammatory  
6     Cytokine Interferon-<sub>γ</sub>; BMSC-CM, Bone-Marrow-Derived Stromal Cell Conditioned Medium; HPLC, High  
7     Performance Liquid Chromatography.

8

## 1 REFERENCES

- 2 (1) Fujisawa, T.; Filippakopoulos, P. Functions of Bromodomain-Containing Proteins and Their Roles in  
3 Homeostasis and Cancer. *Nat Rev Mol Cell Biol* **2017**, *18* (4), 246–262.
- 4 (2) Tough, D. F.; Tak, P. P.; Tarakhovsky, A.; Prinjha, R. K. Epigenetic Drug Discovery: Breaking through  
5 the Immune Barrier. *Nat Rev Drug Discov* **2016**, *15* (12), 835–853.
- 6 (3) Tough, D. F.; Prinjha, R. K. Immune Disease-Associated Variants in Gene Enhancers Point to BET  
7 Epigenetic Mechanisms for Therapeutic Intervention. *Epigenomics* **2017**, *9* (4), 573–584.
- 8 (4) Bandukwala, H. S.; Gagnon, J.; Togher, S.; Greenbaum, J. A.; Lamperti, E. D.; Parr, N. J.;  
9 Molesworth, A. M. H.; Smithers, N.; Lee, K.; Witherington, J.; Tough, D. F.; Prinjha, R. K.; Peters, B.;  
10 Rao, A. Selective Inhibition of CD4+ T-Cell Cytokine Production and Autoimmunity by BET Protein  
11 and c-Myc Inhibitors. *PNAS* **2012**, *109* (36), 14532–14537.
- 12 (5) Schilderink, R.; Bell, M.; Reginato, E.; Patten, C.; Rioja, -->Inmaculada; Hilbers, F. W.; Kabala, P. A.;  
13 Reedquist, K. A.; Tough, D. F.; Tak, P. P.; Prinjha, R. K.; de Jonge, W. J. BET Bromodomain Inhibition  
14 Reduces Maturation and Enhances Tolerogenic Properties of Human and Mouse Dendritic Cells.  
15 *Molecular Immunology* **2016**, *79*, 66–76.
- 16 (6) Belkina, A. C.; Nikolajczyk, B. S.; Denis, G. V. BET Protein Function Is Required for Inflammation:  
17 Brd2 Genetic Disruption and BET Inhibitor JQ1 Impair Mouse Macrophage Inflammatory  
18 Responses. *The Journal of Immunology* **2013**, *190* (7), 3670–3678.
- 19 (7) Nicodeme, E.; Jeffrey, K. L.; Schaefer, U.; Beinke, S.; Dewell, S.; Chung, C.; Chandwani, R.; Marazzi,  
20 I.; Wilson, P.; Coste, H.; White, J.; Kirilovsky, J.; Rice, C. M.; Lora, J. M.; Prinjha, R. K.; Lee, K.;  
21 Tarakhovsky, A. Suppression of Inflammation by a Synthetic Histone Mimic. *Nature* **2010**, *468*  
22 (7327), 1119–1123.
- 23 (8) Zhang, Q.; Qian, J.; Zhu, Y. Targeting Bromodomain-Containing Protein 4 (BRD4) Benefits  
24 Rheumatoid Arthritis. *Immunology Letters* **2015**, *166* (2), 103–108.
- 25 (9) Prinjha, R. K.; Witherington, J.; Lee, K. Place Your BETs: The Therapeutic Potential of  
26 Bromodomains. *Trends in Pharmacological Sciences* **2012**, *33* (3), 146–153.
- 27 (10) Filippakopoulos, P.; Qi, J.; Picaud, S.; Shen, Y.; Smith, W. B.; Fedorov, O.; Morse, E. M.; Keates, T.;  
28 Hickman, T. T.; Felletar, I.; Philpott, M.; Munro, S.; McKeown, M. R.; Wang, Y.; Christie, A. L.; West,  
29 N.; Cameron, M. J.; Schwartz, B.; Heightman, T. D.; La Thangue, N.; French, C. A.; Wiest, O.; Kung,  
30 A. L.; Knapp, S.; Bradner, J. E. Selective Inhibition of BET Bromodomains. *Nature* **2010**, *468* (7327),  
31 1067–1073.
- 32 (11) Chaidos, A.; Caputo, V.; Gouvedenou, K.; Liu, B.; Marigo, I.; Chaudhry, M. S.; Rotolo, A.; Tough, D.  
33 F.; Smithers, N. N.; Bassil, A. K.; Chapman, T. D.; Harker, N. R.; Barbash, O.; Tummino, P.; Al-Mahdi,  
34 N.; Haynes, A. C.; Cutler, L.; Le, B.; Rahemtulla, A.; Roberts, I.; Kleijnen, M.; Witherington, J. J.; Parr,  
35 N. J.; Prinjha, R. K.; Karadimitris, A. Potent Antimyeloma Activity of the Novel Bromodomain  
36 Inhibitors I-BET151 and I-BET762. *Blood* **2014**, *123* (5), 697–705.
- 37 (12) da Motta, L. L.; Ledaki, I.; Purshouse, K.; Haider, S.; De Bastiani, M. A.; Baban, D.; Morotti, M.;  
38 Steers, G.; Wigfield, S.; Bridges, E.; Li, J.-L.; Knapp, S.; Ebner, D.; Klamt, F.; Harris, A. L.; McIntyre, A.  
39 The BET Inhibitor JQ1 Selectively Impairs Tumour Response to Hypoxia and Downregulates CA9  
40 and Angiogenesis in Triple Negative Breast Cancer. *Oncogene* **2017**, *36* (1), 122–132.
- 41 (13) Rhyasen, G. W.; Hattersley, M. M.; Yao, Y.; Dulak, A.; Wang, W.; Petteruti, P.; Dale, I. L.; Boiko, S.;  
42 Cheung, T.; Zhang, J.; Wen, S.; Castriotta, L.; Lawson, D.; Collins, M.; Bao, L.; Ahdesmaki, M. J.;  
43 Walker, G.; O'Connor, G.; Yeh, T. C.; Rabow, A. A.; Dry, J. R.; Reimer, C.; Lyne, P.; Mills, G. B.;  
44 Fawell, S. E.; Waring, M. J.; Zinda, M.; Clark, E.; Chen, H. AZD5153: A Novel Bivalent BET  
45 Bromodomain Inhibitor Highly Active against Hematologic Malignancies. *Mol Cancer Ther* **2016**, *15*  
46 (11), 2563–2574.
- 47 (14) Picaud, S.; Wells, C.; Felletar, I.; Brotherton, D.; Martin, S.; Savitsky, P.; Diez-Dacal, B.; Philpott, M.;  
48 Bountra, C.; Lingard, H.; Fedorov, O.; Müller, S.; Brennan, P. E.; Knapp, S.; Filippakopoulos, P. RVX-

- 1 208, an Inhibitor of BET Transcriptional Regulators with Selectivity for the Second Bromodomain.  
2 *PNAS* **2013**, *110* (49), 19754–19759.
- 3 (15) Filippakopoulos, P.; Picaud, S.; Fedorov, O.; Keller, M.; Wrobel, M.; Morgenstern, O.; Bracher, F.;  
4 Knapp, S. Benzodiazepines and Benzotriazepines as Protein Interaction Inhibitors Targeting  
5 Bromodomains of the BET Family. *Bioorg Med Chem* **2012**, *20* (6), 1878–1886.
- 6 (16) Noel, J. K.; Iwata, K.; Ooike, S.; Sugahara, K.; Nakamura, H.; Daibata, M. Abstract C244:  
7 Development of the BET Bromodomain Inhibitor OTX015. *Mol Cancer Ther* **2013**, *12* (11  
8 Supplement), C244–C244.
- 9 (17) Seal, J.; Lamotte, Y.; Donche, F.; Bouillot, A.; Mirguet, O.; Gellibert, F.; Nicodeme, E.; Krysa, G.;  
10 Kirilovsky, J.; Beinke, S.; McCleary, S.; Rioja, I.; Bamborough, P.; Chung, C.-W.; Gordon, L.; Lewis, T.;  
11 Walker, A. L.; Cutler, L.; Lugo, D.; Wilson, D. M.; Witherington, J.; Lee, K.; Prinjha, R. K.  
12 Identification of a Novel Series of BET Family Bromodomain Inhibitors: Binding Mode and Profile of  
13 I-BET151 (GSK1210151A). *Bioorg. Med. Chem. Lett.* **2012**, *22* (8), 2968–2972..
- 14 (18) Liu, Z.; Wang, P.; Chen, H.; Wold, E. A.; Tian, B.; Brasier, A. R.; Zhou, J. Drug Discovery Targeting  
15 Bromodomain-Containing Protein 4. *J. Med. Chem.* **2017**, *60* (11), 4533–4558.
- 16 (19) Doroshow, D. B.; Eder, J. P.; LoRusso, P. M. BET Inhibitors: A Novel Epigenetic Approach. *Ann Oncol*  
17 **2017**, *28* (8), 1776–1787.
- 18 (20) Alqahtani, A.; Choucair, K.; Ashraf, M.; Hammouda, D. M.; Alloghbi, A.; Khan, T.; Senzer, N.;  
19 Nemunaitis, J. Bromodomain and Extra-Terminal Motif Inhibitors: A Review of Preclinical and  
20 Clinical Advances in Cancer Therapy. *Future Science OA* **2019**, *5*(3) FSO372.
- 21 (21) Andrieu, G.; Belkina, A. C.; Denis, G. V. Clinical Trials for BET Inhibitors Run Ahead of the Science.  
22 *Drug Discovery Today: Technologies* **2016**, *19*, 45–50.
- 23 (22) Postel-Vinay, S.; Herbschleb, K.; Massard, C.; Woodcock, V.; Soria, J.-C.; Walter, A. O.; Ewerton, F.;  
24 Poelman, M.; Benson, N.; Ocker, M.; Wilkinson, G.; Middleton, M. First-in-Human Phase I Study of  
25 the Bromodomain and Extraterminal Motif Inhibitor BAY 1238097: Emerging  
26 Pharmacokinetic/Pharmacodynamic Relationship and Early Termination Due to Unexpected  
27 Toxicity. *European Journal of Cancer* **2019**, *109*, 103–110.
- 28 (23) Odenike, O.; Wolff, J. E.; Borthakur, G.; Aldoss, I. T.; Rizzieri, D.; Prebet, T.; Hu, B.; Dinh, M.; Chen,  
29 X.; Modi, D.; Freise, K. J.; Jonas, B. A. Results from the First-in-Human Study of Mivebresib (ABBV-  
30 075), a Pan-Inhibitor of Bromodomain and Extra Terminal Proteins, in Patients with  
31 Relapsed/Refractory Acute Myeloid Leukemia. *JCO* **2019**, *37* (15\_suppl), 7030–7030.
- 32 (24) Rianjongdee, F.; Atkinson, S. J.; Chung, C.-W.; Grandi, P.; Gray, J. R. J.; Kaushansky, L. J.; Medeiros,  
33 P.; Messenger, C.; Phillipou, A.; Preston, A.; Prinjha, R. K.; Rioja, I.; Satz, A. L.; Taylor, S.; Wall, I. D.;  
34 Watson, R. J.; Yao, G.; Demont, E. H. Discovery of a Highly Selective BET BD2 Inhibitor from a DNA-  
35 Encoded Library Technology Screening Hit. *J Med Chem* **2021**, *64* (15), 10806–10833.
- 36 (25) Seal, J. T.; Atkinson, S. J.; Bamborough, P.; Bassil, A.; Chung, C.-W.; Foley, J.; Gordon, L.; Grandi, P.;  
37 Gray, J. R. J.; Harrison, L. A.; Kruger, R. G.; Matteo, J. J.; McCabe, M. T.; Messenger, C.; Mitchell, D.;  
38 Phillipou, A.; Preston, A.; Prinjha, R. K.; Rianjongdee, F.; Rioja, I.; Taylor, S.; Wall, I. D.; Watson, R. J.;  
39 Woolven, J. M.; Wyce, A.; Zhang, X.-P.; Demont, E. H. Fragment-Based Scaffold Hopping:  
40 Identification of Potent, Selective, and Highly Soluble Bromo and Extra Terminal Domain (BET)  
41 Second Bromodomain (BD2) Inhibitors. *J Med Chem* **2021**, *64* (15), 10772–10805.
- 42 (26) Lucas, S. C. C.; Atkinson, S. J.; Chung, C.; Davis, R.; Gordon, L.; Grandi, P.; Gray, J. J. R.; Grimes, T.;  
43 Phillipou, A.; Preston, A. G.; Prinjha, R. K.; Rioja, I.; Taylor, S.; Tomkinson, N. C. O.; Wall, I.; Watson,  
44 R. J.; Woolven, J.; Demont, E. H. Optimization of a Series of 2,3-Dihydrobenzofurans as Highly  
45 Potent, Second Bromodomain (BD2)-Selective, Bromo and Extra-Terminal Domain (BET) Inhibitors.  
46 *J. Med. Chem.* **2021**, *64* (15), 10711–10741.
- 47 (27) Harrison, L. A.; Atkinson, S. J.; Bassil, A.; Chung, C.-W.; Grandi, P.; Gray, J. R. J.; Levernier, E.; Lewis,  
48 A.; Lugo, D.; Messenger, C.; Michon, A.-M.; Mitchell, D. J.; Preston, A.; Prinjha, R. K.; Rioja, I.; Seal,

- 1 J. T.; Taylor, S.; Wall, I. D.; Watson, R. J.; Woolven, J. M.; Demont, E. H. Identification of a Series of  
2 N-Methylpyridine-2-Carboxamides as Potent and Selective Inhibitors of the Second Bromodomain  
3 (BD2) of the Bromo and Extra Terminal Domain (BET) Proteins. *J Med Chem* **2021**, *64* (15), 10742–  
4 10771.
- 5 (28) Gacias, M.; Gerona-Navarro, G.; Plotnikov, A. N.; Zhang, G.; Zeng, L.; Kaur, J.; Moy, G.; Rusinova, E.;  
6 Rodriguez, Y.; Matikainen, B.; Vincek, A.; Joshua, J.; Casaccia, P.; Zhou, M.-M. Selective Chemical  
7 Modulation of Gene Transcription Favors Oligodendrocyte Lineage Progression. *Chem Biol* **2014**,  
8 *21* (7), 841–854.
- 9 (29) Cheung, K.; Lu, G.; Sharma, R.; Vincek, A.; Zhang, R.; Plotnikov, A. N.; Zhang, F.; Zhang, Q.; Ju, Y.;  
10 Hu, Y.; Zhao, L.; Han, X.; Meslamani, J.; Xu, F.; Jaganathan, A.; Shen, T.; Zhu, H.; Rusinova, E.; Zeng,  
11 L.; Zhou, J.; Yang, J.; Peng, L.; Ohlmeyer, M.; Walsh, M. J.; Zhang, D. Y.; Xiong, H.; Zhou, M.-M. BET  
12 N-Terminal Bromodomain Inhibition Selectively Blocks Th17 Cell Differentiation and Ameliorates  
13 Colitis in Mice. *Proc Natl Acad Sci U S A* **2017**, *114* (11), 2952–2957.
- 14 (30) Gilan, O.; Rioja, I.; Knezevic, K.; Bell, M. J.; Yeung, M. M.; Harker, N. R.; Lam, E. Y. N.; Chung, C.;  
15 Bamborough, P.; Petretich, M.; Urh, M.; Atkinson, S. J.; Bassil, A. K.; Roberts, E. J.; Vassiliadis, D.;  
16 Burr, M. L.; Preston, A. G. S.; Wellaway, C.; Werner, T.; Gray, J. R.; Michon, A.-M.; Gobbetti, T.;  
17 Kumar, V.; Soden, P. E.; Haynes, A.; Vappiani, J.; Tough, D. F.; Taylor, S.; Dawson, S.-J.; Bantscheff,  
18 M.; Lindon, M.; Drewes, G.; Demont, E. H.; Daniels, D. L.; Grandi, P.; Prinjha, R. K.; Dawson, M. A.  
19 Selective Targeting of BD1 and BD2 of the BET Proteins in Cancer and Immunoinflammation.  
20 *Science* **2020**, *368* (6489), 387–394.
- 21 (31) McLure, K. G.; Gesner, E. M.; Tsujikawa, L.; Kharenko, O. A.; Attwell, S.; Campeau, E.; Wasiaik, S.;  
22 Stein, A.; White, A.; Fontano, E.; Suto, R. K.; Wong, N. C. W.; Wagner, G. S.; Hansen, H. C.; Young, P.  
23 R. RVX-208, an Inducer of ApoA-I in Humans, Is a BET Bromodomain Antagonist. *PLoS One* **2013**, *8*  
24 (12), e83190.
- 25 (32) Law, R. P.; Atkinson, S. J.; Bamborough, P.; Chung, C.; Demont, E. H.; Gordon, L. J.; Lindon, M.;  
26 Prinjha, R. K.; Watson, A. J. B.; Hirst, D. J. Discovery of Tetrahydroquinoxalines as Bromodomain  
27 and Extra-Terminal Domain (BET) Inhibitors with Selectivity for the Second Bromodomain. *Journal*  
28 *of Medicinal Chemistry* **2018**, *61*(10):4317-4334.
- 29 (33) Faivre, E. J.; McDaniel, K. F.; Albert, D. H.; Mantena, S. R.; Plotnik, J. P.; Wilcox, D.; Zhang, L.; Bui,  
30 M. H.; Sheppard, G. S.; Wang, L.; Sehgal, V.; Lin, X.; Huang, X.; Lu, X.; Uziel, T.; Hessler, P.; Lam, L.  
31 T.; Bellin, R. J.; Mehta, G.; Fidanze, S.; Pratt, J. K.; Liu, D.; Hasvold, L. A.; Sun, C.; Panchal, S. C.;  
32 Nicolette, J. J.; Fossey, S. L.; Park, C. H.; Longenecker, K.; Bigelow, L.; Torrent, M.; Rosenberg, S. H.;  
33 Kati, W. M.; Shen, Y. Selective Inhibition of the BD2 Bromodomain of BET Proteins in Prostate  
34 Cancer. *Nature* **2020**, *578* (7794), 306–310.
- 35 (34) Sheppard, G. S.; Wang, L.; Fidanze, S. D.; Hasvold, L. A.; Liu, D.; Pratt, J. K.; Park, C. H.; Longenecker,  
36 K.; Qiu, W.; Torrent, M.; Kovar, P. J.; Bui, M.; Faivre, E.; Huang, X.; Lin, X.; Wilcox, D.; Zhang, L.;  
37 Shen, Y.; Albert, D. H.; Magoc, T. J.; Rajaraman, G.; Kati, W. M.; McDaniel, K. F. Discovery of N-  
38 Ethyl-4-[2-(4-Fluoro-2,6-Dimethyl-Phenoxy)-5-(1-Hydroxy-1-Methyl-Ethyl)Phenyl]-6-Methyl-7-Oxo-  
39 1H-Pyrrolo[2,3-c]Pyridine-2-Carboxamide (ABBV-744), a BET Bromodomain Inhibitor with  
40 Selectivity for the Second Bromodomain. *J. Med. Chem.* **2020**, *63* (10), 5585–5623.
- 41 (35) Preston, A.; Atkinson, S.; Bamborough, P.; Chung, C.-W.; Craggs, P. D.; Gordon, L.; Grandi, P.; Gray,  
42 J. R. J.; Jones, E. J.; Lindon, M.; Michon, A.-M.; Mitchell, D. J.; Prinjha, R. K.; Rianjongdee, F.; Rioja,  
43 I.; Seal, J.; Taylor, S.; Wall, I.; Watson, R. J.; Woolven, J.; Demont, E. H. Design and Synthesis of a  
44 Highly Selective and In Vivo-Capable Inhibitor of the Second Bromodomain of the Bromodomain  
45 and Extra Terminal Domain Family of Proteins. *J Med Chem* **2020**, *63* (17), 9070–9092.
- 46 (36) Bosc, N.; Muller, C.; Hoffer, L.; Lagorce, D.; Bourg, S.; Derviaux, C.; Gourdel, M.-E.; Rain, J.-C.;  
47 Miller, T. W.; Villoutreix, B. O.; Miteva, M. A.; Bonnet, P.; Morelli, X.; Sperandio, O.; Roche, P. Fr-

- 1 PPIChem: An Academic Compound Library Dedicated to Protein–Protein Interactions. *ACS Chem.*  
2 *Biol.* **2020**, 15(6):1566–1574.
- 3 (37) Degorce, F.; Card, A.; Soh, S.; Trinquet, E.; Knapik, G. P.; Xie, B. HTRF: A Technology Tailored for  
4 Drug Discovery - a Review of Theoretical Aspects and Recent Applications. *Curr Chem Genomics*  
5 **2009**, 3, 22–32.
- 6 (38) Chen, Z.; Zhang, H.; Liu, S.; Xie, Y.; Jiang, H.; Lu, W.; Xu, H.; Yue, L.; Zhang, Y.; Ding, H.; Zheng, M.;  
7 Yu, K.; Chen, K.; Jiang, H.; Luo, C. Discovery of Novel Trimethoxy-Ring BRD4 Bromodomain  
8 Inhibitors: AlphaScreen Assay, Crystallography and Cell-Based Assay †The Authors Declare No  
9 Competing Interests. ‡Electronic Supplementary Information (ESI) Available. See DOI:  
10 10.1039/C7md00083a. *Medchemcomm* **2017**, 8 (6), 1322–1331.
- 11 (39) Wang, K.; Kim, D.; Dömling, A. Cyanoacetamide MCR (III): Three-Component Gewald Reactions  
12 Revisited. *J. Comb. Chem.* **2010**, 12 (1), 111–118.
- 13 (40) Mertz, J. A.; Conery, A. R.; Bryant, B. M.; Sandy, P.; Balasubramanian, S.; Mele, D. A.; Bergeron, L.;  
14 Sims, R. J. Targeting MYC Dependence in Cancer by Inhibiting BET Bromodomains. *Proc Natl Acad*  
15 *Sci U S A* **2011**, 108 (40), 16669–16674.
- 16 (41) Collignon, A.; Hospital, M. A.; Montersino, C.; Courtier, F.; Charbonnier, A.; Saillard, C.; D’Incan, E.;  
17 Mohty, B.; Guille, A.; Adelaïde, J.; Carbuccioni, N.; Garnier, S.; Mozziconacci, M. J.; Zemmour, C.;  
18 Pakradouni, J.; Restouin, A.; Castellano, R.; Chaffanet, M.; Birnbaum, D.; Collette, Y.; Vey, N. A  
19 Chemogenomic Approach to Identify Personalized Therapy for Patients with Relapse or Refractory  
20 Acute Myeloid Leukemia: Results of a Prospective Feasibility Study. *Blood Cancer J* **2020**, 10 (6), 64.
- 21 (42) Karjalainen, R.; Pemovska, T.; Popa, M.; Liu, M.; Javarappa, K. K.; Majumder, M. M.; Yadav, B.;  
22 Tamborero, D.; Tang, J.; Bychkov, D.; Kontro, M.; Parsons, A.; Suvela, M.; Mayoral Safont, M.;  
23 Porkka, K.; Aittokallio, T.; Kallioniemi, O.; McCormack, E.; Gjertsen, B. T.; Wennerberg, K.; Knowles,  
24 J.; Heckman, C. A. JAK1/2 and BCL2 Inhibitors Synergize to Counteract Bone Marrow Stromal Cell-  
25 Induced Protection of AML. *Blood* **2017**, 130 (6), 789–802.
- 26 (43) Benyamine, A.; Le Roy, A.; Mamessier, E.; Gertner-Dardenne, J.; Castanier, C.; Orlanducci, F.;  
27 Pouyet, L.; Goubard, A.; Collette, Y.; Vey, N.; Scotet, E.; Castellano, R.; Olive, D. BTN3A Molecules  
28 Considerably Improve Vγ9Vδ2T Cells-Based Immunotherapy in Acute Myeloid Leukemia.  
29 *Oncoimmunology* **2016**, 5 (10), e1146843.
- 30 (44) Di Veroli, G. Y.; Fornari, C.; Wang, D.; Mollard, S.; Bramhall, J. L.; Richards, F. M.; Jodrell, D. I.  
31 Combenefit: An Interactive Platform for the Analysis and Visualization of Drug Combinations.  
32 *Bioinformatics* **2016**, 32 (18), 2866–2868.
- 33 (45) Bhadury, J.; Nilsson, L. M.; Muralidharan, S. V.; Green, L. C.; Li, Z.; Gesner, E. M.; Hansen, H. C.;  
34 Keller, U. B.; McLure, K. G.; Nilsson, J. A. BET and HDAC Inhibitors Induce Similar Genes and  
35 Biological Effects and Synergize to Kill in Myc-Induced Murine Lymphoma. *PNAS* **2014**, 111 (26),  
36 E2721–E2730.
- 37 (46) Dickson, M. A.; Rathkopf, D. E.; Carvajal, R. D.; Grant, S.; Roberts, J. D.; Reid, J. M.; Ames, M. M.;  
38 McGovern, R. M.; Lefkowitz, R. A.; Gonen, M.; Cane, L. M.; Dials, H. J.; Schwartz, G. K. A Phase I  
39 Pharmacokinetic Study of Pulse-Dose Vorinostat with Flavopiridol in Solid Tumors. *Invest New*  
40 *Drugs* **2011**, 29 (5), 1004–1012.
- 41 (47) Amorim, S.; Stathis, A.; Gleeson, M.; Iyengar, S.; Magarotto, V.; Leleu, X.; Morschhauser, F.; Karlin,  
42 L.; Broussais, F.; Rezai, K.; Herait, P.; Kahatt, C.; Lokiec, F.; Salles, G.; Facon, T.; Palumbo, A.;  
43 Cunningham, D.; Zucca, E.; Thieblemont, C. Bromodomain Inhibitor OTX015 in Patients with  
44 Lymphoma or Multiple Myeloma: A Dose-Escalation, Open-Label, Pharmacokinetic, Phase 1 Study.  
45 *Lancet Haematol* **2016**, 3 (4), e196–204.
- 46 (48) Berthon, C.; Raffoux, E.; Thomas, X.; Vey, N.; Gomez-Roca, C.; Yee, K.; Taussig, D. C.; Rezai, K.;  
47 Roumier, C.; Herait, P.; Kahatt, C.; Quesnel, B.; Michallet, M.; Recher, C.; Lokiec, F.; Preudhomme,

- 1 C.; Dombret, H. Bromodomain Inhibitor OTX015 in Patients with Acute Leukaemia: A Dose-  
2 Escalation, Phase 1 Study. *Lancet Haematol* **2016**, *3* (4), e186-195.
- 3 (49) Lewin, J.; Soria, J.-C.; Stathis, A.; Delord, J.-P.; Peters, S.; Awada, A.; Aftimos, P. G.; Bekradda, M.;  
4 Rezai, K.; Zeng, Z.; Hussain, A.; Perez, S.; Siu, L. L.; Massard, C. Phase Ib Trial With Birabresib, a  
5 Small-Molecule Inhibitor of Bromodomain and Extraterminal Proteins, in Patients With Selected  
6 Advanced Solid Tumors. *J Clin Oncol* **2018**, *36* (30), 3007–3014.
- 7 (50) Zhao, L.; Okhovat, J.-P.; Hong, E. K.; Kim, Y. H.; Wood, G. S. Preclinical Studies Support Combined  
8 Inhibition of BET Family Proteins and Histone Deacetylases as Epigenetic Therapy for Cutaneous T-  
9 Cell Lymphoma. *Neoplasia* **2019**, *21* (1), 82–92.
- 10 (51) Romagnoli, R.; Prencipe, F.; Oliva, P.; Cacciari, B.; Balzarini, J.; Liekens, S.; Hamel, E.; Brancale, A.;  
11 Ferla, S.; Manfredini, S.; Zurlo, M.; Finotti, A.; Gambari, R. Synthesis and Biological Evaluation of  
12 New Antitubulin Agents Containing 2-(3',4',5'-Trimethoxyanilino)-3,6-Disubstituted-4,5,6,7-  
13 Tetrahydrothieno[2,3-c]Pyridine Scaffold. *Molecules* **2020**, *25* (7), 1690.
- 14 (52) Cai, M.-G.; Wu, Y.; Chang, J. Synthesis and Biological Evaluation of 2-Arylimino-3-Pyridin-  
15 Thiazolineone Derivatives as Antibacterial Agents. *Bioorg Med Chem Lett* **2016**, *26* (10), 2517–  
16 2520.
- 17 (53) Filippakopoulos, P.; Knapp, S. The Bromodomain Interaction Module. *FEBS Letters* **2012**, *586* (17),  
18 2692–2704.
